# Supplementary material for: Isoform switching of CD47 induces macrophage-initiated cancer cell pyroptosis
Source: Research Square preprint supplement (doi:10.21203/rs.3.rs-6981061/v1), 2025-08-08
Supplement: Supplementary file 1 [file 1f41265b1e0161cc67ffe0e5.xlsx]

## Sheet: Rank
Supplementary Table 6 Single-cell CRISPR screening for the splicing regulator of CD47
Rank	Gene	Cell Counts	SpliZ Mean	SpliZ Median	p-value	delta SpliZ	Splicing factor
1	SNRNP27	13	-0.201042	-0.514815	0.463294	-0.148607	SF
2	SNRPA	17	-0.559384	-0.489858	0.00173119	-0.50695	SF
3	SRSF1	12	-0.425436	-0.482292	0.0160521	-0.373002	SF
4	SF3A1	22	-0.40545	-0.45416	0.00387316	-0.353016	SF
5	EFTUD2	11	-0.356109	-0.413058	0.0536044	-0.303675	SF
6	U2AF2	15	-0.347904	-0.411041	0.0203478	-0.29547	SF
7	PRPF31	11	-0.375842	-0.360207	0.0129088	-0.323408	SF
8	HNRNPL	44	-0.307771	-0.354374	0.000807068	-0.255336	SF
9	SNRNP200	18	-0.259816	-0.314372	0.201914	-0.207382	SF
10	HNRNPA1	30	-0.241768	-0.29758	0.0394399	-0.189334	SF
11	PRPF18	13	-0.243425	-0.270997	0.269793	-0.190991	SF
12	DHX8	23	-0.194834	-0.236356	0.140383	-0.1424	SF
13	CD2BP2	15	-0.0585672	-0.230323	0.979006	-0.00613317	SF
14	WBP11	33	-0.155655	-0.203339	0.218943	-0.103221	SF
15	HTATSF1	22	-0.126795	-0.200953	0.484053	-0.0743614	SF
16	PRPF8	12	-0.170746	-0.200746	0.44875	-0.118312	SF
17	SART1	13	-0.166657	-0.199449	0.345959	-0.114223	SF
18	DDX23	11	-0.333799	-0.185949	0.188706	-0.281365	SF
19	LSM7	24	-0.223013	-0.182935	0.155457	-0.170579	SF
20	MAGOH	34	-0.181505	-0.156648	0.142295	-0.129071	SF
21	NAA38	14	-0.204089	-0.144793	0.211878	-0.151655	SF
22	SRSF3	14	-0.136249	-0.0971409	0.624084	-0.0838146	SF
23	C9orf78	22	-0.0567878	-0.0425936	0.966197	-0.00435369	SF
24	SNW1	37	0.00474046	-0.0210838	0.447882	0.0571745	SF
25	ZMAT2	22	-0.0613851	-0.0168392	0.933019	-0.00895107	SF
26	SRRM1	13	-0.103148	-0.00669305	0.670105	-0.0507143	SF
27	non-target	3109	-0.0524341	-0.00364807	NA	NA	nonSF
28	IK	91	-0.0361673	-0.00323491	0.742506	0.0162668	SF
29	DDX46	43	-0.0782262	0.00532864	0.70843	-0.0257921	SF
30	SF3A2	36	0.0274233	0.0267963	0.336026	0.0798573	SF
31	LSM3	29	0.199525	0.0338804	0.092425	0.251959	SF
32	SNRNP40	29	0.132155	0.042074	0.0719788	0.184589	SF
33	SRSF6	62	0.00481102	0.0704072	0.33676	0.0572451	SF
34	PHF5A	25	0.171158	0.0723016	0.109276	0.223592	SF
35	HNRNPM	31	-0.134392	0.0783691	0.486029	-0.0819583	SF
36	CTNNBL1	12	0.0489809	0.0928618	0.393824	0.101415	SF
37	SF3B1	13	0.106618	0.14781	0.131728	0.159052	SF
38	HSPA8	23	0.0391172	0.161094	0.413905	0.0915513	SF
39	PPIL1	26	0.000338708	0.168113	0.539259	0.0527728	SF
40	PTBP1	11	-0.0301705	0.173119	0.893413	0.0222635	SF
41	HNRNPR	19	0.0149591	0.195198	0.54328	0.0673932	SF
42	HNRNPK	11	0.0907096	0.21127	0.477807	0.143144	SF
43	SRP54	20	0.0709557	0.212983	0.368844	0.12339	SF
44	ACIN1	62	0.131256	0.231962	0.00159094	0.18369	SF
45	HNRNPH1	18	0.0396999	0.257573	0.430728	0.092134	SF
46	USP39	18	0.265842	0.279788	0.00016183	0.318276	SF
47	HNRNPDL	14	0.254259	0.297071	0.00326799	0.306693	SF
48	SF3B3	13	0.155669	0.303157	0.36828	0.208103	SF
49	YBX1	17	0.321492	0.340633	0.00718952	0.373926	SF
50	CHERP	15	0.551303	0.404337	0.000627318	0.603737	SF
51	NFATC2IP	30	0.434338	0.428088	1.65016e-08	0.486772	SF
