# Supplementary material for: Isoform switching of CD47 induces macrophage-initiated cancer cell pyroptosis
Source: Research Square preprint supplement (doi:10.21203/rs.3.rs-6981061/v1), 2025-08-08
Supplement: Supplementary file 2 [file 4e7b126518899d0af576fe7c.xlsx]

## Sheet: Sheet1
Supplementary Table 7 HNRNPA1 binding genes identified by CLIP-seq
LACE-seq2	Peak number		CLIP-seq	Peak numer		eCLIP-seq	Peak number
A1BG	2		A1CF	3		AACSP1	6
A1CF	6		A3GALT2	1		AAGAB	2
A2M	2		A4GNT	1		AAK1	2
A2ML1	4		AAAS	1		AARSD1	2
A4GALT	6		AACS	1		AATBC	2
AA06	5		AADACL3	1		AATF	2
AAAS	3		AADACP1	1		ABCA11P	2
AACS	1		AAGAB	1		ABCA2	4
AACSP1	2		AAK1	4		ABCA4	2
AADAC	3		AAR2	2		ABCB5	2
AADACL3	4		AARS2	1		ABCB8	2
AADACL4	2		AASS	1		ABCC1	3
AADACP1	20		AATBC	1		ABCC12	2
AADAT	5		AATF	1		ABCC13	2
AAGAB	2		ABAT	2		ABCC4	2
AAK1	6		ABCA11P	1		ABCC5	2
AAMDC	4		ABCA13	3		ABCC6P1	4
AAMP	1		ABCA17P	1		ABCD2	2
AANAT	2		ABCA3	1		ABHD12	3
AAR2	1		ABCA4	1		ABHD16A	2
AARD	1		ABCA6	1		ABHD17A	4
AARS1	14		ABCA7	1		ABHD2	2
AARS2	1		ABCA8	1		ABHD5	6
AASDH	3		ABCA9	1		ABHD6	2
AASS	1		ABCB1	2		ABI3BP	2
AATBC	1		ABCB10	2		ABL1	10
AATF	4		ABCB5	3		ABLIM1	4
AATK	2		ABCB7	4		ABLIM2	2
ABALON	11		ABCC1	2		ABO	19
ABAT	2		ABCC11	3		ABRA	2
ABCA1	10		ABCC12	1		ABRACL	4
ABCA10	1		ABCC2	2		ABT1	2
ABCA11P	1		ABCC4	6		ABTB1	2
ABCA12	5		ABCC5	2		ABTB2	4
ABCA13	4		ABCC6P1	3		ACACA	8
ABCA17P	1		ABCC6P2	1		ACAP3	4
ABCA3	4		ABCC8	1		ACAT1	4
ABCA4	6		ABCC9	2		ACBD6	4
ABCA5	2		ABCD3	3		ACER3	4
ABCA6	3		ABCE1	1		ACHE	2
ABCA7	3		ABCG1	1		ACIN1	2
ABCA8	2		ABCG2	2		ACMSD	2
ABCB1	4		ABCG8	1		ACO2	2
ABCB10	1		ABHD12	2		ACOT13	1
ABCB11	1		ABHD13	1		ACOXL	2
ABCB4	2		ABHD14A	1		ACSF2	2
ABCB5	1		ABHD2	1		ACSF3	2
ABCB7	3		ABHD3	1		ACSL3	6
ABCB9	3		ABHD5	1		ACSL4	4
ABCC1	9		ABI1	2		ACSS2	2
ABCC10	1		ABI2	4		ACSS3	2
ABCC11	1		ABI3	1		ACTB	6
ABCC12	1		ABI3BP	6		ACTG2	2
ABCC2	3		ABL1	2		ACTL6A	2
ABCC3	2		ABL2	4		ACTL7B	4
ABCC4	8		ABLIM1	4		ACTN1	4
ABCC5	6		ABLIM2	2		ACTN4	6
ABCC6	3		ABLIM3	1		ACTR1B	2
ABCC6P1	2		ABR	2		ACTR2	2
ABCC6P2	1		ABRA	1		ACTR3	4
ABCC8	1		ABRACL	1		ACTR3B	4
ABCC9	1		ABRAXAS2	2		ACTR3BP5	2
ABCD1	1		ABT1	1		ACTR3C	6
ABCD3	7		ABTB1	1		ACTR5	2
ABCD4	1		ABTB2	1		ACTRT1	4
ABCE1	5		ABTB3	4		ACTRT2	2
ABCF3	3		ACACA	4		ACVR1B	2
ABCG1	3		ACACB	1		ACVR1C	2
ABCG2	3		ACAD10	2		ACVR2A	2
ABCG4	1		ACAD11	1		ACVR2B	2
ABCG5	2		ACAD8	1		ADA2	2
ABHD1	1		ACAD9	1		ADAM10	4
ABHD11	1		ACADL	1		ADAM12	2
ABHD12	3		ACADM	1		ADAM17	2
ABHD12B	3		ACAN	1		ADAM22	2
ABHD16B	2		ACAP2	3		ADAM28	2
ABHD17A	3		ACAT1	1		ADAM5	2
ABHD17B	4		ACAT2	1		ADAM6	1
ABHD17C	4		ACBD3	1		ADAM8	1
ABHD2	5		ACBD4	1		ADAM9	1
ABHD3	3		ACBD6	2		ADAMTS14	4
ABHD5	5		ACCS	2		ADAMTS17	2
ABHD6	2		ACCSL	1		ADAMTS9	2
ABHD8	1		ACE2	1		ADAMTSL1	2
ABI1	3		ACER1	1		ADAMTSL4	2
ABI2	24		ACER2	3		ADAMTSL5	2
ABI3	1		ACIN1	2		ADARB1	2
ABI3BP	4		ACKR2	2		ADARB2	2
ABL1	13		ACKR3	2		ADAT2	2
ABL2	43		ACMSD	1		ADCK1	2
ABLIM1	5		ACO1	5		ADCY1	2
ABLIM2	6		ACO2	1		ADCY10P1	2
ABLIM3	5		ACOD1	1		ADCY2	2
ABO	3		ACOT2	1		ADCY3	4
ABR	18		ACOT7	1		ADCY4	2
ABRA	5		ACOT9	1		ADD3	2
ABRACL	7		ACOX1	1		ADGRA3	4
ABRAXAS1	1		ACOX3	1		ADGRB3	8
ABRAXAS2	1		ACOXL	1		ADGRD1	2
ABTB1	1		ACP3	1		ADGRL2	2
ABTB2	9		ACP5	1		ADGRL3	4
ABTB3	12		ACP6	1		ADGRL4	4
ACAA1	1		ACP7	2		ADGRV1	2
ACAA2	3		ACRV1	1		ADIPOR2	2
ACACA	6		ACSF2	1		ADK	5
ACACB	5		ACSF3	4		ADNP2	2
ACAD10	2		ACSL3	5		ADRA1D	2
ACAD11	2		ACSL4	2		ADRA2A	2
ACAD8	1		ACSL6	2		ADRA2C	2
ACAD9	1		ACSM2B	1		ADRB1	2
ACADL	1		ACSS1	2		ADSL	2
ACADM	2		ACSS3	3		AEBP2	4
ACADS	1		ACTA1	1		AFDN	1
ACADSB	1		ACTB	1		AFF1	2
ACADVL	2		ACTG1P25	1		AFF2	6
ACAN	2		ACTL6A	1		AFF3	6
ACAP1	1		ACTL7B	3		AFG2A	4
ACAP2	16		ACTL8	3		AFMID	2
ACAT1	2		ACTN2	2		AGAP1	19
ACAT2	5		ACTR10	1		AGAP10P	2
ACBD3	1		ACTR2	1		AGAP12P	4
ACBD4	1		ACTR3BP2	4		AGAP13P	4
ACBD5	1		ACTR3BP5	4		AGAP14P	2
ACBD6	3		ACTR3C	1		AGAP3	8
ACBD7	1		ACTR5	1		AGAP4	2
ACE	2		ACTRT1	7		AGAP5	4
ACE2	3		ACVR1	2		AGAP6	2
ACER1	1		ACVR1C	1		AGAP7P	2
ACER2	2		ACVR2A	10		AGAP9	4
ACER3	13		ACVR2B	2		AGBL1	3
ACIN1	18		ACVRL1	1		AGBL4	4
ACKR3	9		ACY1	1		AGFG1	2
ACLY	29		ACY3	1		AGO1	2
ACO1	9		ACYP2	3		AGO2	6
ACO2	2		ADA2	2		AGO3	2
ACOT11	4		ADAM10	5		AGPAT2	2
ACOT12	1		ADAM11	1		AGPAT3	6
ACOT13	3		ADAM12	2		AGPAT4	4
ACOT6	3		ADAM17	1		AGPAT5	2
ACOT7	4		ADAM18	2		AGPS	6
ACOT9	2		ADAM2	2		AGRN	4
ACOX2	1		ADAM20	1		AGT	2
ACOX3	3		ADAM20P1	1		AGTPBP1	1
ACOXL	9		ADAM22	1		AHCTF1	8
ACP1	1		ADAM23	4		AHCY	4
ACP5	3		ADAM28	3		AHDC1	13
ACP6	1		ADAM3A	3		AHNAK	4
ACP7	2		ADAMTS1	2		AHSG	2
ACRBP	1		ADAMTS12	4		AICDA	2
ACRV1	3		ADAMTS15	1		AIF1L	2
ACSBG1	2		ADAMTS16	1		AIG1	6
ACSF2	2		ADAMTS17	6		AIRE	4
ACSF3	3		ADAMTS18	1		AJM1	1
ACSL1	1		ADAMTS19	2		AK1	1
ACSL3	12		ADAMTS20	2		AK4	2
ACSL4	18		ADAMTS3	6		AKAP1	2
ACSL5	1		ADAMTS4	1		AKAP10	2
ACSL6	3		ADAMTS6	5		AKAP4	2
ACSM2A	1		ADAMTS7	1		AKAP8L	2
ACSM2B	1		ADAMTS8	1		AKAP9	3
ACSM3	4		ADAMTS9	4		AKIRIN1	2
ACSM5	1		ADAMTSL1	8		AKR1C3	2
ACSM6	1		ADAMTSL3	4		AKT2	2
ACSS1	2		ADAMTSL5	1		ALAD	2
ACSS2	7		ADAP1	1		ALAS1	2
ACSS3	1		ADAP2	2		ALAS2	2
ACTA1	3		ADARB1	1		ALCAM	4
ACTB	6		ADARB2	1		ALDH18A1	2
ACTC1	2		ADAT2	4		ALDH1A2	2
ACTG1	20		ADCK1	3		ALDH3A1	2
ACTG1P20	3		ADCK2	1		ALDOA	6
ACTG1P25	3		ADCK5	2		ALG10	2
ACTG2	1		ADCY1	4		ALG12	2
ACTL6A	11		ADCY10	2		ALG6	1
ACTL6B	1		ADCY10P1	1		ALG8	2
ACTL7A	1		ADCY2	9		ALLC	2
ACTL7B	16		ADCY3	4		ALOX5	2
ACTL8	2		ADCY5	3		ALPK3	2
ACTL9	1		ADCY6	1		ALX4	2
ACTMAP	2		ADCY8	3		ALYREF	2
ACTN1	63		ADCY9	1		AMBRA1	6
ACTN2	1		ADCYAP1	1		AMDHD2	4
ACTN4	78		ADD2	1		AMER3	2
ACTR10	2		ADD3	2		AMFR	2
ACTR1A	4		ADGB	1		AMMECR1	2
ACTR2	29		ADGRA2	2		AMMECR1L	2
ACTR3	18		ADGRA3	8		AMOTL1	2
ACTR3B	10		ADGRB1	1		AMPH	2
ACTR3BP2	6		ADGRB2	1		AMZ1	2
ACTR3BP5	3		ADGRB3	15		ANAPC1	2
ACTR3C	6		ADGRD1	5		ANAPC10	2
ACTR5	5		ADGRD2	1		ANAPC2	4
ACTR6	1		ADGRF3	1		ANAPC4	2
ACTR8	3		ADGRF4	1		ANAPC7	4
ACTRT1	12		ADGRF5	1		ANGPT4	2
ACTRT2	4		ADGRG2	3		ANGPTL5	2
ACVR1	5		ADGRG4	1		ANHX	2
ACVR1B	2		ADGRL1	3		ANK1	14
ACVR1C	2		ADGRL2	12		ANK2	4
ACVR2A	6		ADGRL3	11		ANK3	2
ACVRL1	1		ADGRL4	3		ANKFN1	6
ACY1	1		ADGRV1	5		ANKHD1	4
ACY3	1		ADHFE1	2		ANKIB1	6
ACYP1	1		ADIG	1		ANKLE2	2
ACYP2	3		ADIPINT	1		ANKRD10	2
ADA	4		ADK	5		ANKRD11	4
ADA2	1		ADM2	1		ANKRD12	2
ADAD1	1		ADNP	1		ANKRD17	2
ADAM10	11		ADNP2	1		ANKRD18CP	2
ADAM11	2		ADORA1	1		ANKRD18DP	2
ADAM12	9		ADPGK	3		ANKRD20A11P	2
ADAM15	1		ADPRHL1	1		ANKRD20A19P	2
ADAM17	4		ADRA1A	4		ANKRD28	2
ADAM19	25		ADRA1B	2		ANKRD30A	2
ADAM2	1		ADRA1D	1		ANKRD30BL	4
ADAM20	1		ADRA2A	2		ANKRD31	2
ADAM21	2		ADRA2B	1		ANKRD60	2
ADAM22	4		ADRA2C	1		ANKRD61	2
ADAM23	4		ADRB1	2		ANKRD7	2
ADAM28	9		ADRB2	2		ANKS1B	2
ADAM29	1		ADRB3	2		ANKS6	9
ADAM32	3		ADSL	2		ANO10	4
ADAM3A	1		ADSS2	3		ANO7	2
ADAM3B	4		ADTRP	1		ANO9	3
ADAM6	5		AEBP2	5		ANP32A	2
ADAM9	7		AEN	2		ANP32E	2
ADAMTS1	14		AFAP1	1		ANTXR2	2
ADAMTS12	12		AFAP1L1	4		ANXA1	2
ADAMTS13	2		AFDN	10		ANXA2	4
ADAMTS14	3		AFF2	11		ANXA2P3	2
ADAMTS15	4		AFF3	10		ANXA4	2
ADAMTS16	5		AFF4	1		ANXA6	2
ADAMTS17	4		AFG1L	1		AOC3	2
ADAMTS18	4		AFG2A	2		AOPEP	6
ADAMTS19	1		AFG2B	1		AOX1	2
ADAMTS2	4		AFG3L2	1		AP2B1	4
ADAMTS20	9		AFMID	1		AP2S1	2
ADAMTS3	4		AFP	2		AP3B1	2
ADAMTS5	2		AFTPH	2		AP3D1	3
ADAMTS6	18		AGAP1	8		AP4M1	1
ADAMTS7P1	1		AGAP10P	2		APBA1	2
ADAMTS8	1		AGAP12P	4		APBA2	5
ADAMTS9	4		AGAP13P	3		APBB1IP	2
ADAMTSL1	75		AGAP3	2		APBB2	4
ADAMTSL3	6		AGAP4	2		APC	4
ADAMTSL4	3		AGAP5	1		APEX1	1
ADAP1	6		AGAP6	1		APEX2	1
ADAP2	3		AGAP7P	3		APH1B	2
ADAR	21		AGAP9	2		APLF	2
ADARB1	3		AGBL1	3		APOBEC3F	2
ADARB2	9		AGBL4	3		APOBEC3G	2
ADAT1	1		AGBL5	2		APOE	2
ADAT2	5		AGGF1	1		APP	2
ADCK1	6		AGK	2		APPBP2	1
ADCK2	1		AGMO	6		APRG1	4
ADCK5	4		AGO1	2		APTX	4
ADCY1	7		AGO3	3		AQP1	2
ADCY10	3		AGO4	1		AQP10	2
ADCY10P1	1		AGPAT3	1		AQR	3
ADCY2	10		AGPAT4	2		ARAP1	4
ADCY3	5		AGPAT5	3		ARB2A	4
ADCY4	1		AGPS	1		AREL1	2
ADCY5	11		AGRN	3		ARF1	2
ADCY6	3		AGTPBP1	11		ARFGAP2	2
ADCY7	8		AGTR1	2		ARFGAP3	2
ADCY8	5		AHCTF1	3		ARFGEF2	6
ADCY9	9		AHCTF1P1	1		ARGLU1	2
ADCYAP1	1		AHCY	2		ARHGAP11A	2
ADCYAP1R1	2		AHCYL1	1		ARHGAP15	2
ADD1	5		AHCYL2	5		ARHGAP17	2
ADD2	11		AHDC1	1		ARHGAP21	2
ADD3	5		AHI1	5		ARHGAP23	2
ADGB	2		AHR	3		ARHGAP24	6
ADGRA1	2		AHRR	1		ARHGAP25	4
ADGRA3	9		AHSA2P	1		ARHGAP28	4
ADGRB1	6		AIF1L	1		ARHGAP32	6
ADGRB2	2		AIFM1	2		ARHGAP35	4
ADGRB3	11		AIG1	8		ARHGAP39	9
ADGRD1	7		AIM2	1		ARHGAP40	2
ADGRD2	1		AIMP1	2		ARHGAP42	2
ADGRE1	3		AJAP1	2		ARHGAP45	1
ADGRE2	1		AJUBA	1		ARHGAP6	6
ADGRE3	3		AK2	4		ARHGDIA	4
ADGRE4P	3		AK3	5		ARHGEF1	4
ADGRE5	1		AK4	2		ARHGEF10	1
ADGRF1	2		AK5	5		ARHGEF11	2
ADGRF3	4		AK9	1		ARHGEF12	2
ADGRF5	4		AKAIN1	1		ARHGEF16	2
ADGRG1	2		AKAP1	1		ARHGEF18	4
ADGRG2	5		AKAP10	3		ARHGEF19	4
ADGRG4	3		AKAP11	3		ARHGEF2	2
ADGRG5	2		AKAP12	4		ARHGEF26	2
ADGRG6	3		AKAP13	12		ARHGEF28	3
ADGRL1	6		AKAP14	2		ARHGEF38	1
ADGRL2	20		AKAP17BP	1		ARHGEF40	2
ADGRL3	12		AKAP3	1		ARID1A	4
ADGRL4	2		AKAP4	1		ARID1B	8
ADGRV1	10		AKAP6	5		ARID2	2
ADH1C	1		AKAP7	6		ARID3A	2
ADH7	1		AKAP8	2		ARID3B	2
ADHFE1	4		AKAP9	5		ARID4B	1
ADI1	1		AKNA	1		ARIH1	2
ADIPINT	3		AKR1A1	2		ARL15	4
ADIPOR1	1		AKR1C4	1		ARL3	2
ADIPOR2	12		AKR1C6P	1		ARL6IP4	2
ADISSP	4		AKR1C8	1		ARL8A	1
ADK	10		AKT3	17		ARL9	2
ADM2	1		ALAD	2		ARNT	2
ADNP	7		ALB	1		ARPC5	2
ADNP2	2		ALCAM	12		ARRDC4	2
ADO	2		ALDH1A1	5		ARVCF	2
ADORA1	3		ALDH1A2	3		ARX	4
ADORA2A	2		ALDH1L1	3		ASAH1	2
ADORA2B	5		ALDH3A2	1		ASAP1	6
ADPGK	1		ALDH3B2	1		ASAP3	2
ADPRH	1		ALDH5A1	1		ASCC3	3
ADPRHL1	2		ALDH7A1	2		ASH1L	2
ADPRM	1		ALDH8A1	3		ASIC4	3
ADRA1A	2		ALDH9A1	1		ASIP	2
ADRA1D	2		ALDOC	1		ASMT	1
ADRA2A	6		ALG10	3		ASPH	5
ADRA2B	3		ALG10B	2		ASPSCR1	2
ADRA2C	2		ALG13	7		ASRGL1	2
ADRB1	3		ALG14	1		ASTN2	2
ADRB2	16		ALG1L2	3		ASXL1	1
ADRB3	1		ALG5	1		ASXL2	4
ADSL	9		ALG6	2		ASXL3	2
ADSS1	1		ALG8	2		ATAD1	2
ADSS2	9		ALG9	1		ATAD3A	2
ADTRP	28		ALKAL1	1		ATF4	2
AEBP2	27		ALKBH1	1		ATF6	1
AFAP1	5		ALKBH4	1		ATG10	2
AFAP1L1	3		ALKBH5	2		ATG4C	4
AFAP1L2	1		ALKBH7	1		ATG7	1
AFDN	3		ALLC	1		ATG9A	2
AFF1	6		ALMS1	5		ATN1	2
AFF2	14		ALMS1P1	2		ATOSA	4
AFF3	13		ALOX12	1		ATP11A	1
AFF4	20		ALOX15B	1		ATP11B	2
AFG1L	6		ALOX5AP	2		ATP11C	2
AFG2A	9		ALOXE3	2		ATP13A3	6
AFG3L1P	1		ALPI	1		ATP1A1	2
AFG3L2	11		ALPK1	2		ATP1B3	2
AFM	1		ALPL	1		ATP2A2	2
AFMID	1		ALX3	1		ATP2A3	2
AGA	1		ALX4	3		ATP2B1	2
AGAP1	28		AMACR	3		ATP2C1	3
AGAP10P	7		AMD1	3		ATP5F1A	2
AGAP12P	18		AMELY	2		ATP5IF1	2
AGAP13P	12		AMER1	2		ATP5MK	2
AGAP14P	5		AMIGO2	2		ATP6AP2	4
AGAP2	1		AMMECR1	1		ATP6V0A1	2
AGAP3	3		AMN	1		ATP6V0D1	2
AGAP4	11		AMOT	2		ATP6V1B2	2
AGAP5	10		AMOTL1	2		ATP6V1C1	2
AGAP6	7		AMPD3	2		ATP6V1D	2
AGAP7P	11		AMPH	8		ATP6V1G1	2
AGAP9	13		AMY1C	4		ATP7A	3
AGBL1	4		AMY2A	1		ATP9B	2
AGBL2	4		AMY2B	1		ATRN	4
AGBL4	7		AMZ1	1		ATRX	2
AGBL5	2		AMZ2	1		ATXN10	4
AGFG1	3		AMZ2P1	1		ATXN2L	7
AGFG2	1		ANAPC1	4		ATXN3L	2
AGGF1	2		ANAPC10	3		ATXN7L1	2
AGK	6		ANAPC1P2	1		ATXN7L3B	1
AGL	1		ANAPC1P4	1		AUH	4
AGMAT	1		ANAPC1P6	2		AURKAP1	2
AGMO	6		ANAPC2	1		AUTS2	8
AGO1	1		ANAPC4	1		AVEN	2
AGO2	37		ANAPC5	3		AVL9	2
AGPAT2	4		ANAPC7	2		AZI2	2
AGPAT3	10		ANG	3		AZU1	2
AGPAT4	13		ANGEL1	1		B3GALNT2	2
AGPAT5	2		ANGEL2	2		B3GALT9	2
AGPS	3		ANGPT1	6		B3GNT2	2
AGRN	7		ANGPTL1	2		B3GNT8	4
AGT	2		ANGPTL2	1		B4GALNT4	1
AGTPBP1	6		ANGPTL3	2		B4GALT2	2
AGTR1	1		ANGPTL5	3		B4GALT5	2
AGTR2	3		ANK1	3		B4GALT6	2
AGTRAP	2		ANK2	7		B4GALT7	2
AGXT2	3		ANK3	12		BAAT	2
AHCTF1	15		ANKAR	4		BACH1	2
AHCTF1P1	13		ANKDD1A	2		BAG1	3
AHCY	1		ANKDD1B	1		BAG3	1
AHCYL1	5		ANKFN1	4		BAG6	2
AHCYL2	6		ANKFY1	6		BAGE2	14
AHDC1	10		ANKH	1		BAHCC1	2
AHI1	7		ANKHD1	2		BAHD1	3
AHNAK	49		ANKIB1	5		BAIAP2	6
AHNAK2	114		ANKMY1	1		BAIAP3	4
AHRR	3		ANKRA2	1		BALR6	2
AHSA1	1		ANKRD10	13		BARD1	2
AHSA2P	3		ANKRD11	3		BARX2	2
AHSG	1		ANKRD12	5		BAZ1B	2
AIDA	7		ANKRD13C	3		BAZ2B	2
AIFM2	1		ANKRD17	9		BBC3	2
AIFM3	1		ANKRD18A	1		BBS4	6
AIG1	6		ANKRD18B	6		BBX	2
AIM2	2		ANKRD19P	2		BCAM	6
AIMP1	2		ANKRD20A21P	2		BCAP29	4
AIPL1	2		ANKRD20A2P	1		BCAR1	2
AIRE	1		ANKRD20A5P	3		BCAS3	3
AIRIM	1		ANKRD20A8P	2		BCAS4	2
AJAP1	7		ANKRD20A9P	5		BCAT1	2
AJM1	1		ANKRD26	2		BCAT2	2
AJUBA	13		ANKRD26P1	2		BCDIN3D	2
AK2	5		ANKRD27	2		BCHE	2
AK3	6		ANKRD28	4		BCKDHB	6
AK4	1		ANKRD30A	6		BCL11B	2
AK5	1		ANKRD30B	2		BCL2	2
AK7	2		ANKRD30BL	3		BCL2L12	2
AK8	5		ANKRD30BP2	1		BCL2L2	4
AK9	3		ANKRD33B	2		BCL6	2
AKAIN1	4		ANKRD36	19		BCL9L	2
AKAP1	5		ANKRD36B	6		BCOR	6
AKAP10	7		ANKRD36BP2	2		BCORL1	4
AKAP11	3		ANKRD36C	4		BCORP1	2
AKAP12	40		ANKRD40CL	1		BCR	4
AKAP13	65		ANKRD44	2		BCRP2	2
AKAP14	2		ANKRD46	3		BDP1	6
AKAP17A	1		ANKRD50	3		BEND3	2
AKAP17BP	2		ANKRD55	3		BEND5	4
AKAP3	1		ANKRD6	1		BEST2	2
AKAP4	1		ANKRD62	1		BHMT	2
AKAP6	11		ANKS1A	2		BICC1	2
AKAP7	6		ANKS1B	6		BICRA	6
AKAP8	3		ANKS3	1		BIRC6	6
AKAP8L	1		ANKS6	1		BLCAP	4
AKAP9	8		ANLN	3		BLM	2
AKIRIN1	5		ANO1	2		BLNK	2
AKIRIN2	2		ANO10	1		BLTP1	2
AKNA	1		ANO2	9		BLVRA	2
AKNAD1	3		ANO3	8		BLVRB	2
AKR1A1	2		ANO4	7		BMAL2	2
AKR1B1	1		ANO5	4		BMI1	2
AKR1B10	1		ANO6	4		BMP1	2
AKR1B15	1		ANOS1	1		BMP2K	4
AKR1C1	2		ANP32A	1		BMP7	2
AKR1C3	1		ANP32AP1	2		BMPER	2
AKR1C4	1		ANP32E	2		BMPR1A	2
AKR1C8	2		ANTXR1	4		BMPR1B	2
AKR1D1	1		ANTXR2	3		BMPR2	6
AKR7A2	2		ANTXRL	1		BMS1	2
AKT1	1		ANXA1	2		BMS1P17	5
AKT2	7		ANXA10	1		BMS1P22	4
AKT3	31		ANXA11	1		BMS1P4	1
AKTIP	3		ANXA13	1		BNC2	2
ALAD	1		ANXA5	2		BNIP3	2
ALAS1	2		AOAH	2		BOLA1	2
ALB	2		AOPEP	4		BORA	2
ALCAM	202		AOX1	3		BPGM	2
ALDH18A1	1		AP1B1P1	1		BPNT2	8
ALDH1A2	5		AP1G1	1		BRAT1	2
ALDH1A3	3		AP1G2	1		BRCA1	2
ALDH1B1	1		AP1M1	1		BRD4	2
ALDH1L1	3		AP1S2	2		BRD7	2
ALDH2	2		AP1S3	2		BRDT	2
ALDH3A1	1		AP2A2	1		BRDTP1	3
ALDH3A2	1		AP2B1	2		BRF1	4
ALDH4A1	1		AP2M1	1		BRF2	2
ALDH5A1	1		AP3B1	12		BRINP2	2
ALDH6A1	2		AP3B2	1		BRMS1L	2
ALDH8A1	6		AP3D1	3		BRPF1	2
ALDH9A1	2		AP3M2	1		BRWD3	4
ALDOA	6		AP3S1	3		BSDC1	7
ALG1	1		AP4E1	1		BTAF1	2
ALG10	4		AP5B1	1		BTBD3	4
ALG10B	1		AP5M1	4		BTBD7	2
ALG12	4		APAF1	1		BTBD8	2
ALG13	31		APBA1	1		BTC	2
ALG14	4		APBA2	4		BTF3L4	4
ALG1L1P	1		APBB1IP	3		BTNL10P	1
ALG2	1		APBB2	7		BTNL9	2
ALG5	2		APC	1		BUB1B	2
ALG6	4		APCDD1	1		C10orf55	2
ALG8	1		APELA	2		C10orf71	2
ALG9	3		APH1B	1		C10orf88B	1
ALK	12		API5	4		C11orf87	2
ALKBH1	1		APLF	1		C12orf57	1
ALKBH2	1		APMAP	2		C12orf75	4
ALKBH3	1		APOBEC3F	1		C13orf46	4
ALKBH4	1		APOBEC4	1		C14orf132	2
ALKBH5	2		APOC1	1		C17orf67	2
ALLC	2		APOD	1		C18orf15	2
ALMS1	3		APOH	1		C18orf63	2
ALMS1P1	1		APOL3	1		C19orf81	4
ALOX12	1		APOLD1	1		C1D	2
ALOX12B	2		APOOP5	5		C1orf141	2
ALOX12P2	1		APP	8		C1orf167	4
ALOX15	2		APPAT	5		C1orf185	2
ALOX15P1	1		APPBP2	3		C1orf21	2
ALOX5	2		APPL2	1		C1orf52	1
ALOX5AP	2		APRG1	1		C1orf54	2
ALPG	1		APTX	5		C1orf56	2
ALPI	3		AQP1	2		C1orf87	2
ALPK1	3		AQP8	1		C1QL2	2
ALPK2	1		AQR	3		C1QTNF6	2
ALPK3	2		AR	6		C1RL	2
ALPL	2		ARAP1	1		C1S	2
ALPP	2		ARAP2	5		C20orf203	4
ALS2	3		ARB2A	6		C20orf204	2
ALS2CL	2		AREG	2		C22orf39	5
ALX1	1		ARFGAP3	3		C2CD3	2
ALX3	1		ARFGEF1	2		C2CD5	2
ALX4	3		ARFGEF2	4		C2orf88	2
ALYREF	3		ARFIP1	3		C3	2
AMACR	1		ARG1	2		C4orf54	2
AMBN	2		ARHGAP10	5		C5AR1	2
AMBP	2		ARHGAP11A	1		C5orf15	2
AMBRA1	7		ARHGAP11B	2		C6	2
AMD1	6		ARHGAP12	4		C6orf163	4
AMDHD1	1		ARHGAP15	8		C7orf25	2
AMDHD2	1		ARHGAP17	2		C8B	2
AMELX	1		ARHGAP18	1		C8orf82	2
AMELY	8		ARHGAP20	3		C9orf72	2
AMER1	4		ARHGAP21	6		CA5BP1	2
AMER3	1		ARHGAP22	3		CA8	3
AMFR	2		ARHGAP23	1		CAAP1	2
AMHR2	6		ARHGAP24	5		CAB39	2
AMIGO1	1		ARHGAP25	1		CABIN1	7
AMIGO2	2		ARHGAP26	7		CABLES1	3
AMIGO3	3		ARHGAP28	2		CACHD1	4
AMMECR1	5		ARHGAP31	2		CACNA1A	4
AMMECR1L	3		ARHGAP32	2		CACNA1D	6
AMN	2		ARHGAP35	4		CACNA1E	6
AMN1	6		ARHGAP39	1		CACNA1I	1
AMOT	1		ARHGAP40	1		CACNA2D1	6
AMOTL1	12		ARHGAP42	6		CADM1	2
AMOTL2	76		ARHGAP44	1		CADM2	2
AMPD1	1		ARHGAP5	3		CADPS	2
AMPD3	2		ARHGAP6	3		CALM2	2
AMPH	5		ARHGAP8	1		CALM3	2
AMTN	1		ARHGEF10	1		CALML4	2
AMY1A	1		ARHGEF10L	1		CALML5	4
AMY1C	1		ARHGEF12	2		CALN1	4
AMY2B	3		ARHGEF18	1		CAMK1	2
AMZ1	4		ARHGEF2	2		CAMK2A	2
AMZ2	3		ARHGEF26	1		CAMK2D	2
AMZ2P1	1		ARHGEF28	5		CAMKK2	2
ANAPC1	5		ARHGEF3	3		CAMKMT	4
ANAPC10	3		ARHGEF37	1		CAMP	2
ANAPC13	2		ARHGEF38	3		CAMSAP1	2
ANAPC16	3		ARHGEF39	1		CAMTA1	4
ANAPC1P1	2		ARHGEF4	2		CAND1.11	1
ANAPC1P2	1		ARHGEF6	2		CAND2	1
ANAPC1P4	1		ARHGEF7	1		CANT1	2
ANAPC1P6	1		ARHGEF9	1		CAP2	2
ANAPC2	1		ARID1B	16		CAPN2	4
ANAPC4	2		ARID2	5		CAPN3	2
ANAPC5	6		ARID4A	2		CAPRIN1	2
ANAPC7	5		ARID4B	1		CAPS2	2
ANG	2		ARID5B	5		CAPZA1	2
ANGEL1	1		ARIH1	4		CARD10	2
ANGEL2	3		ARIH2	2		CARD17P	2
ANGPT1	7		ARK2C	2		CARD19	2
ANGPT2	1		ARK2N	1		CARHSP1	2
ANGPT4	1		ARL1	1		CARM1	2
ANGPTL1	7		ARL10	2		CARS1	2
ANGPTL2	2		ARL14EP	2		CARS2	2
ANGPTL3	1		ARL15	2		CARTPT	6
ANGPTL6	1		ARL2BP	1		CASC18	1
ANGPTL7	1		ARL3	3		CASC20	1
ANGPTL8	2		ARL4C	1		CASC6	2
ANHX	1		ARL5A	3		CASC9	2
ANK1	9		ARL6IP1	2		CASK	2
ANK2	10		ARL6IP5	1		CASP4	1
ANK3	11		ARL6IP6	2		CASP5	2
ANKAR	2		ARL8B	1		CASR	2
ANKDD1A	3		ARMC3	2		CASS4	2
ANKFN1	6		ARMC8	3		CAST	4
ANKFY1	5		ARMCX5	1		CASTOR2	10
ANKH	3		ARMH1	1		CASTOR3P	2
ANKHD1	10		ARMH2	1		CASZ1	2
ANKIB1	1		ARMH3	2		CATSPERE	2
ANKK1	1		ARMH4	1		CATSPERG	4
ANKLE2	45		ARMS2	1		CAV1	2
ANKMY1	4		ARPC5L	1		CAVIN1	4
ANKMY2	1		ARPIN	1		CBFA2T2	2
ANKRA2	1		ARPP21	14		CBFA2T3	8
ANKRD10	17		ARR3	1		CBLL2	3
ANKRD11	58		ARRDC1	1		CBR4	2
ANKRD12	8		ARRDC2	1		CBS	1
ANKRD13B	1		ARRDC3	2		CBX1	2
ANKRD13C	6		ARSB	2		CBY3	2
ANKRD16	2		ARSF	3		CCAR1	4
ANKRD17	37		ARSG	1		CCBE1	2
ANKRD18B	3		ARSJ	2		CCDC106	2
ANKRD18CP	1		ARSK	1		CCDC115	2
ANKRD19P	3		ARX	10		CCDC12	2
ANKRD2	2		AS3MT	1		CCDC13	2
ANKRD20A11P	1		ASAH2	2		CCDC134	2
ANKRD20A21P	4		ASAH2B	2		CCDC136	2
ANKRD20A2P	2		ASAP1	8		CCDC141	4
ANKRD20A5P	1		ASAP2	6		CCDC144NL	6
ANKRD20A8P	1		ASAP3	1		CCDC149	2
ANKRD20A9P	8		ASB1	1		CCDC158	2
ANKRD22	1		ASB13	1		CCDC159	2
ANKRD24	1		ASB14	1		CCDC160	2
ANKRD26	4		ASB15	1		CCDC170	2
ANKRD26P1	3		ASB18	1		CCDC178	4
ANKRD26P3	2		ASB2	2		CCDC18	2
ANKRD28	30		ASB4	1		CCDC200	2
ANKRD30A	12		ASB5	1		CCDC22	2
ANKRD30B	7		ASB6	1		CCDC26	6
ANKRD30BL	252		ASB7	1		CCDC28B	3
ANKRD30BP2	256		ASB8	1		CCDC63	4
ANKRD30BP3	3		ASCC2	2		CCDC68	2
ANKRD31	3		ASCC3	8		CCDC73	2
ANKRD33B	3		ASCL2	2		CCDC74A	2
ANKRD34A	1		ASCL4	2		CCDC77	2
ANKRD36	95		ASF1A	1		CCDC83	2
ANKRD36B	64		ASF1B	1		CCDC88A	6
ANKRD36BP1	24		ASGR2	2		CCDC88B	2
ANKRD36BP2	8		ASH1L	3		CCDC88C	4
ANKRD36C	97		ASH2L	1		CCDC91	3
ANKRD40	1		ASIC2	2		CCDC97	6
ANKRD42	2		ASIP	1		CCER1	2
ANKRD44	6		ASL	1		CCL28	2
ANKRD50	31		ASMER1	1		CCL5	2
ANKRD52	9		ASMT	2		CCNB1	2
ANKRD54	1		ASMTL	2		CCNB3	2
ANKRD55	5		ASNS	2		CCNL1	2
ANKRD6	2		ASNSP1	9		CCNL2	4
ANKRD62	3		ASPH	4		CCNT1	2
ANKRD9	4		ASPHD2	2		CCNY	6
ANKS1A	2		ASPM	3		CD109	2
ANKS1B	18		ASPN	1		CD164	4
ANKS3	1		ASPRV1	1		CD244	1
ANKS4B	1		ASTN1	1		CD27	2
ANKS6	12		ASTN2	8		CD2AP	8
ANKUB1	3		ASXL1	4		CD4	2
ANLN	27		ASXL2	3		CD40	2
ANO1	8		ASXL3	8		CD46	3
ANO10	5		ASZ1	1		CD47	2
ANO2	6		ATAD1	3		CD53	2
ANO3	6		ATAD2	1		CD55	2
ANO4	5		ATAD2B	2		CD82	2
ANO5	2		ATAD5	2		CD96	2
ANO6	19		ATAT1	2		CD99	2
ANO7	2		ATE1	4		CDADC1	2
ANO9	1		ATF1	1		CDC14C	2
ANOS1	4		ATF2	6		CDC23	3
ANP32A	8		ATF3	5		CDC27	2
ANP32AP1	3		ATF4	3		CDC34	2
ANP32B	9		ATF6	3		CDC42	2
ANP32D	3		ATF7	1		CDC42BPA	2
ANP32E	7		ATF7IP	1		CDC42EP1	4
ANPEP	93		ATF7IP2	5		CDC42SE1	2
ANTXR1	4		ATG10	3		CDC6	2
ANTXR2	11		ATG13	1		CDCA8	1
ANTXRLP1	2		ATG2B	1		CDH1	5
ANXA1	21		ATG3	3		CDH10	2
ANXA10	2		ATG4B	1		CDH11	6
ANXA11	10		ATG4C	3		CDH12	4
ANXA13	2		ATG5	5		CDH18	2
ANXA2	152		ATG7	3		CDH19	2
ANXA2P1	3		ATIC	2		CDH2	2
ANXA2P2	7		ATL1	3		CDH20	6
ANXA2P3	5		ATL2	4		CDH23	2
ANXA3	2		ATM	11		CDH5	2
ANXA4	3		ATOH7	1		CDH6	6
ANXA5	13		ATOSA	3		CDH7	2
ANXA6	25		ATP10B	2		CDH8	8
ANXA7	4		ATP10D	1		CDHR3	2
ANXA8	1		ATP11A	1		CDIN1	2
AOAH	7		ATP11AUN	1		CDK11A	6
AOC2	1		ATP11B	4		CDK12	2
AOPEP	9		ATP11C	4		CDK13	2
AOX1	1		ATP13A4	1		CDK14	2
AP1AR	3		ATP13A5	1		CDK17	6
AP1B1	2		ATP1A1	1		CDK2AP1	2
AP1B1P1	2		ATP1A3	1		CDK5R2	2
AP1G1	8		ATP1B3	1		CDK5RAP1	2
AP1G2	4		ATP2A1	1		CDK5RAP2	6
AP1M1	3		ATP2A2	3		CDK8	2
AP1M2	1		ATP2A3	2		CDK9	2
AP1S2	6		ATP2B1	1		CDKAL1	4
AP1S3	6		ATP2B3	1		CDKN2AIP	2
AP2A1	1		ATP2C1	4		CDKN2C	2
AP2A2	10		ATP2C2	1		CDRT15	2
AP2B1	4		ATP5F1A	1		CDRT15L2	2
AP2M1	10		ATP5F1B	1		CDRT4	2
AP2S1	5		ATP5F1C	1		CDS2	2
AP3B1	11		ATP5F1E	1		CDYL	4
AP3B2	5		ATP5IF1	1		CEACAM21	2
AP3D1	7		ATP5MC2	2		CEACAM22P	2
AP3M1	5		ATP5PF	2		CEBPA	2
AP3M2	2		ATP5PO	2		CECR7	1
AP4E1	1		ATP6AP1L	3		CELF1	4
AP5B1	2		ATP6AP2	4		CELF5	2
AP5M1	5		ATP6V0A1	1		CELSR1	2
AP5Z1	2		ATP6V0A4	3		CEMIP2	2
APAF1	2		ATP6V0D1	1		CENPI	2
APBA1	10		ATP6V0E1	1		CENPK	2
APBA2	6		ATP6V1C1	1		CENPO	2
APBA3	1		ATP6V1C2	2		CENPU	2
APBB1IP	4		ATP6V1D	1		CEP104	2
APBB2	25		ATP6V1E1	1		CEP164	4
APBB3	1		ATP6V1G1	1		CEP170	4
APC	8		ATP6V1H	2		CEP170P1	4
APC2	1		ATP7A	2		CEP192	6
APCDD1L	3		ATP7B	3		CEP350	4
APELA	1		ATP8A1	4		CEP43	4
APH1A	1		ATP8A2	8		CEP57L1	2
APH1B	1		ATP8B1	1		CEP68	2
API5	2		ATP8B4	3		CEP72	1
APLF	3		ATP9A	1		CEP83	2
APLN	2		ATP9B	4		CEP85	2
APLNR	2		ATPAF1	1		CEP85L	4
APLP2	85		ATR	3		CERS4	1
APOA1	2		ATRN	2		CERS5	2
APOA4	1		ATRNL1	4		CERT1	2
APOBEC1	2		ATRX	8		CES1	2
APOBEC3C	1		ATXN1	6		CFAP144	2
APOBEC3G	1		ATXN10	7		CFAP144P2	2
APOD	2		ATXN2	1		CFAP299	2
APOH	4		ATXN7L1	5		CFAP300	2
APOL1	2		ATXN7L3B	5		CFAP44	5
APOL2	1		ATXN8OS	3		CFAP47	6
APOL3	1		AUH	4		CFAP54	2
APOL4	1		AUTS2	22		CFAP92	2
APOL6	1		AVEN	2		CFD	2
APOLD1	3		AVL9	1		CFDP1	2
APOO	9		AVPR1A	2		CFH	2
APOOL	1		AVPR2	1		CFI	2
APOOP5	6		AWAT1	2		CFTR	8
APP	55		AXDND1	2		CGGBP1	2
APPAT	49		AXIN1	1		CHAF1A	2
APPBP2	5		AXIN2	3		CHAT	3
APPL1	1		AXL	2		CHCHD10	2
APPL2	1		AZI2	1		CHCHD4	2
APRG1	2		AZIN1	1		CHCHD6	2
APRT	1		AZIN2	1		CHD1L	2
APTR	1		B3GALNT1	4		CHD2	6
AQP1	2		B3GALNT2	3		CHD3	2
AQP11	2		B3GALT1	3		CHD4	2
AQP12A	1		B3GALT5	1		CHD6	4
AQP12B	1		B3GAT1	1		CHD8	2
AQP3	3		B3GAT2	1		CHD9	1
AQP5	1		B3GLCT	1		CHDH	2
AQP6	1		B3GNT2	1		CHID1	4
AQP7	1		B3GNT3	1		CHIT1	2
AQP7B	2		B3GNT6	1		CHML	4
AQP9	1		B3GNT7	1		CHMP4B	2
AQR	7		B3GNTL1	3		CHN2	2
AR	10		B4GALNT1	1		CHORDC1P4	2
ARAP1	23		B4GALNT3	3		CHP1	2
ARAP2	8		B4GALNT4	1		CHPF	6
ARAP3	6		B4GALT3	1		CHRAC1	2
ARB2A	7		B4GALT5	2		CHRNA7	2
ARC	1		B4GALT6	3		CHST11	1
AREL1	3		B4GALT7	3		CHST12	2
ARF1	3		B9D1	1		CHSY3	2
ARF3	3		BAALC	1		CHURC1	2
ARF4	2		BABAM2	3		CIC	2
ARF6	11		BACE1	1		CILP2	2
ARFGAP1	1		BAG1	1		CIMIP1	1
ARFGAP3	6		BAG4	1		CIMIP2B	2
ARFGEF1	21		BAGE2	2		CITED2	2
ARFGEF2	17		BAIAP2	1		CIZ1	10
ARFGEF3	1		BAIAP2L1	1		CKMT2	2
ARFIP1	1		BALR6	3		CLASP1	4
ARFIP2	2		BAMBI	1		CLASP2	1
ARFRP1	2		BANF1	1		CLASRP	2
ARG1	1		BANF2	1		CLCC1	3
ARG2	2		BANK1	5		CLCN2	2
ARGLU1	10		BANP	2		CLCN7	2
ARHGAP1	5		BARD1	3		CLDN12	2
ARHGAP10	13		BARHL1	1		CLDN16	2
ARHGAP11A	18		BARX2	3		CLEC2L	2
ARHGAP11B	20		BASP1	2		CLEC4GP1	2
ARHGAP12	14		BATF2	1		CLECL1P	2
ARHGAP15	14		BATF3	1		CLIC5	2
ARHGAP17	1		BAZ1B	2		CLIP1	2
ARHGAP18	8		BAZ2A	1		CLIP3	2
ARHGAP19	4		BAZ2B	5		CLN8	2
ARHGAP20	6		BBOX1	3		CLPTM1	2
ARHGAP21	39		BBS1	1		CLPTM1L	2
ARHGAP22	503		BBS12	1		CLSTN1	2
ARHGAP23	27		BBS2	2		CLSTN2	1
ARHGAP24	10		BBS4	2		CLTB	2
ARHGAP25	2		BBS5	3		CLUAP1	2
ARHGAP26	11		BBS9	6		CLUH	2
ARHGAP27	4		BBX	5		CLVS1	3
ARHGAP28	3		BCAM	1		CMA1	2
ARHGAP29	223		BCAN	1		CMAS	4
ARHGAP31	2		BCAR3	2		CMIP	7
ARHGAP32	8		BCAR4	1		CMPK1	2
ARHGAP33	1		BCAS2	1		CNBD1	2
ARHGAP35	20		BCAS3	10		CNDP2	6
ARHGAP36	2		BCDIN3D	2		CNIH4	2
ARHGAP39	7		BCHE	6		CNKSR2	1
ARHGAP40	5		BCKDHA	1		CNN2	2
ARHGAP42	7		BCKDHB	7		CNOT3	2
ARHGAP44	4		BCL11A	1		CNOT7	2
ARHGAP45	2		BCL11B	4		CNOT9	2
ARHGAP5	10		BCL2	3		CNTLN	2
ARHGAP6	1		BCL2L11	1		CNTN4	2
ARHGAP8	7		BCL2L13	2		CNTN5	2
ARHGDIA	3		BCL2L14	1		CNTNAP2	14
ARHGDIB	1		BCL2L2	1		CNTNAP4	2
ARHGEF1	8		BCL3	1		CNTNAP5	4
ARHGEF10	20		BCL6	1		CNTROB	2
ARHGEF10L	5		BCL7A	1		COA7	2
ARHGEF11	10		BCL7C	1		COA8	2
ARHGEF12	35		BCL9	2		COBL	2
ARHGEF16	2		BCL9L	1		COCH	2
ARHGEF17	1		BCLAF1	7		COG5	6
ARHGEF18	12		BCLAF3	1		COG6	4
ARHGEF19	2		BCO2	1		COG7	2
ARHGEF2	12		BCOR	1		COL11A1	2
ARHGEF26	3		BCORL1	2		COL15A1	2
ARHGEF28	81		BCORP1	3		COL22A1	2
ARHGEF3	6		BDH2	1		COL23A1	4
ARHGEF33	2		BDKRB1	1		COL27A1	2
ARHGEF37	5		BDKRB2	1		COL3A1	2
ARHGEF38	5		BDNF	3		COL4A5	3
ARHGEF4	20		BDP1	3		COL4A6	2
ARHGEF6	1		BECN2	2		COL6A5	2
ARHGEF7	3		BEGAIN	1		COL9A1	2
ARHGEF9	7		BEND2	1		COMT	4
ARID1A	14		BEND3P3	2		COP1	4
ARID1B	29		BEND4	1		COPB2	2
ARID2	14		BEND5	2		COPE	2
ARID3A	5		BEND6	3		COPG2	2
ARID3B	2		BEND7	2		COPS3	4
ARID3C	1		BEX1	1		COPZ1	2
ARID4B	5		BEX3	1		COQ8B	4
ARID5A	1		BFSP1	1		CORO1A	1
ARID5B	5		BHLHA9	1		CORO1C	6
ARIH1	2		BHLHE23	1		CORO7	2
ARIH2	4		BHMT	1		COTL1	2
ARK2C	4		BICC1	7		COX4I1	2
ARK2N	2		BICD1	3		COX6B2	1
ARL1	4		BICD2	1		COX8A	2
ARL10	1		BICRA	2		CPA4	2
ARL11	3		BIN1	1		CPA5	2
ARL13A	2		BIN3	1		CPEB1	4
ARL13B	1		BIRC2	3		CPEB2	2
ARL14	2		BIRC6	5		CPEB3	2
ARL14EPL	1		BLCAP	2		CPED1	7
ARL15	3		BLM	5		CPM	2
ARL2	1		BLMH	1		CPNE1	2
ARL2BP	1		BLNK	1		CPNE4	6
ARL4AP5	1		BLTP1	6		CPNE5	2
ARL4C	16		BLTP3A	1		CPNE7	5
ARL5A	1		BLVRA	1		CPNE8	4
ARL5B	2		BLZF1	2		CPOX	1
ARL6	2		BMAL1	1		CPS1	4
ARL6IP1	15		BMAL2	3		CPT1A	2
ARL6IP4	1		BMERB1	1		CR1L	6
ARL6IP6	6		BMP10	1		CRACD	2
ARL8A	1		BMP15	1		CRADD	2
ARL8B	2		BMP2	1		CRAMP1	3
ARLNC1	3		BMP2K	3		CRB1	4
ARMC1	2		BMP3	3		CRCT1	2
ARMC10	4		BMP4	4		CREB1	4
ARMC2	2		BMP5	4		CREB3L1	2
ARMC3	7		BMP6	3		CREB5	2
ARMC5	2		BMP7	1		CREBRF	2
ARMC7	1		BMPER	6		CRHBP	4
ARMC8	8		BMPR1A	3		CRISP1	2
ARMC9	5		BMPR1B	5		CRKL	2
ARMCX1	3		BMPR2	4		CRLF2	1
ARMCX2	1		BMS1P1	1		CRLF3	2
ARMCX4	2		BMS1P14	1		CRLS1	2
ARMCX5	1		BMS1P17	11		CRNN	2
ARMH3	7		BMS1P20	2		CRPPA	2
ARMH4	2		BMS1P21	1		CRTC1	4
ARMT1	1		BMS1P22	12		CRTC3	2
ARNT	1		BMS1P23	3		CRY1	2
ARNT2	6		BMT2	1		CRYBB2P1	2
ARPC1B	1		BMX	1		CRYBG2	2
ARPC2	16		BNC2	4		CRYGN	2
ARPC3	18		BNIP1	3		CSE1L	2
ARPC5	4		BNIP2	3		CSF1	1
ARPC5L	8		BNIP3	1		CSF3R	2
ARPP19	5		BNIP5	1		CSMD1	8
ARPP21	11		BOD1	1		CSMD2	2
ARRB1	3		BOD1L1	2		CSMD3	6
ARRDC1	2		BOK	1		CSNK1D	2
ARRDC2	2		BORA	1		CSNK1E	2
ARRDC3	1		BORCS7	1		CSNK1G1	2
ARRDC4	1		BPGM	1		CSNK1G3	2
ARRDC5	2		BPHL	1		CSNK2A1	2
ARSB	3		BPI	1		CSNK2A2	2
ARSD	2		BPIFA2	1		CSPG5	2
ARSF	1		BPNT2	4		CSRNP1	2
ARSG	3		BPTF	2		CST7	2
ARSH	1		BPY2	2		CSTF2T	2
ARSJ	4		BPY2B	4		CSTPP1	2
ARSK	1		BPY2C	5		CT83	4
ART1	1		BRAF	8		CTAG1B	2
ARVCF	1		BRAP	1		CTAGE10P	2
ARX	16		BRAT1	1		CTAGE9	2
AS3MT	1		BRCA1	6		CTBP1	4
ASAH1	1		BRCC3	1		CTBP2	4
ASAH2	2		BRD1	1		CTDSPL2	2
ASAH2B	2		BRD10	4		CTF1	2
ASAP1	457		BRD4	2		CTIF	2
ASAP2	66		BRD7P3	2		CTNNA2	6
ASAP3	3		BRD8	1		CTNNA3	2
ASB1	4		BRDT	1		CTNNAL1	2
ASB11	1		BRDTP1	5		CTNNB1	4
ASB12	3		BRI3	1		CTNND2	2
ASB14	1		BRINP1	8		CTPS2	2
ASB15	1		BRINP2	1		CTSB	2
ASB16	1		BRINP3	5		CTSC	2
ASB18	4		BRIP1	5		CTSD	2
ASB2	1		BRS3	1		CTSH	2
ASB5	1		BRWD1	4		CTTN	2
ASB6	2		BRWD3	1		CTTNBP2	2
ASB7	2		BSDC1	1		CUBN	2
ASB8	1		BSPRY	1		CUL3	2
ASB9	3		BSX	1		CUL4A	2
ASCC1	3		BTAF1	4		CUL5	4
ASCC2	3		BTBD1	1		CUX1	6
ASCC3	25		BTBD10	1		CUX2	2
ASCL2	2		BTBD16	3		CWC22	2
ASCL4	1		BTBD18	1		CWC27	2
ASCL5	2		BTBD3	4		CWF19L2	2
ASH1L	17		BTBD7	2		CWH43	8
ASH2L	4		BTBD9	1		CXCL13	2
ASIC1	1		BTC	1		CXCR4	2
ASIC2	3		BTF3	1		CXorf51B	2
ASIP	7		BTG3	3		CXorf58	2
ASL	2		BTLA	4		CXXC1P1	2
ASMER1	21		BTN2A1	1		CXXC4	2
ASMT	3		BTN3A3	1		CXXC5	2
ASMTL	1		BTNL8	1		CYB561	2
ASNSP1	12		BTRC	9		CYB5R3	2
ASPDH	2		BUB1	1		CYBC1	2
ASPH	119		BUB1B	1		CYBRD1	2
ASPM	34		BUB3	1		CYCSP52	2
ASPRV1	1		BUD13	1		CYFIP2	2
ASRGL1	4		BZW1	2		CYLC1	2
ASS1	5		C1D	1		CYP26B1	2
ASTN1	2		C1GALT1	2		CYP2D6	2
ASTN2	9		C1GALT1C1	1		CYP39A1	2
ASXL1	28		C1QBP	1		CYP4B1	2
ASXL2	21		C1QL3	2		CYP4F62P	2
ASXL3	6		C1QTNF3	6		CYP51A1	6
ATAD1	5		C1QTNF7	1		CYRIB	2
ATAD2	4		C1QTNF8	1		CYSLTR1	2
ATAD2B	7		C2	1		CYSTM1	2
ATAD3A	3		C2CD2	1		CYTH1	2
ATAD3B	8		C2CD3	3		CYTOR	8
ATAD3C	3		C2CD4B	1		DAAM1	2
ATAD5	3		C2CD5	1		DAB1	8
ATAT1	4		C2CD6	1		DACH1	2
ATCAY	3		C3	2		DACT1	2
ATE1	5		C4A	1		DAG1	2
ATF1	4		C4B	1		DALRD3	2
ATF2	5		C5	1		DAP3	2
ATF3	3		C6	1		DAPK1	4
ATF4	18		C7	1		DAPP1	2
ATF6	5		C8B	1		DAW1	2
ATF6B	1		C9	1		DAZAP1	14
ATF7	6		CA1	2		DBF4B	2
ATF7IP	24		CA10	4		DBP	2
ATF7IP2	7		CA13	1		DBX2	2
ATG10	7		CA5A	1		DCAF12L1	2
ATG101	1		CA8	3		DCAF12L2	2
ATG12	1		CAAP1	1		DCAF4L2	2
ATG16L1	3		CAB39	3		DCAF6	2
ATG16L2	2		CABCOCO1	3		DCAKD	4
ATG2B	4		CABIN1	3		DCBLD1	2
ATG4B	3		CABLES1	1		DCBLD2	4
ATG4C	3		CABLES2	1		DCDC1	2
ATG4D	2		CABP1	1		DCHS2	2
ATG5	3		CABP7	2		DCK	2
ATG7	12		CACNA1A	5		DCLK1	4
ATIC	2		CACNA1B	2		DCLRE1C	2
ATL1	3		CACNA1C	3		DCP2	2
ATL2	3		CACNA1E	3		DCPS	2
ATL3	4		CACNA1I	3		DCTN6	2
ATM	19		CACNA2D1	13		DCUN1D2	4
ATMIN	2		CACNA2D3	6		DCUN1D5	2
ATN1	23		CACNA2D4	5		DDA1	1
ATOH1	3		CACNB2	3		DDB1	4
ATOH7	1		CACNB3	1		DDHD2	2
ATOH8	1		CACNB4	6		DDIT4L	2
ATOSA	3		CACNG1	2		DDR1	2
ATOSB	1		CACNG2	1		DDT	2
ATOX1	2		CACNG4	1		DDX10	6
ATP10A	1		CACNG8	1		DDX11	4
ATP10B	4		CACUL1	1		DDX11L5	4
ATP11A	6		CACYBP	3		DDX12P	4
ATP11AUN	4		CAD	1		DDX17	2
ATP11B	10		CADM1	5		DDX39A	2
ATP11C	11		CADM2	5		DDX39B	2
ATP12A	2		CADPS	8		DDX3X	2
ATP13A1	1		CADPS2	7		DDX52	2
ATP13A2	1		CALCA	1		DDX53	3
ATP13A3	30		CALCRL	1		DDX54	2
ATP13A4	2		CALD1	3		DDX60L	2
ATP1A1	9		CALM1	1		DEF6	3
ATP1A2	2		CALML5	1		DEGS1	2
ATP1A3	3		CALN1	4		DEK	2
ATP1B1	4		CAMK1D	1		DELEC1	2
ATP1B3	15		CAMK2D	8		DENND1A	8
ATP1B4	1		CAMK2G	1		DENND2B	2
ATP23	2		CAMK4	2		DENND4B	2
ATP2A1	4		CAMKK1	1		DENND5A	4
ATP2A2	39		CAMKMT	9		DEPDC5	2
ATP2A3	5		CAMLG	1		DERPC	3
ATP2B1	8		CAMSAP1	2		DFFB	2
ATP2B2	7		CAMSAP2	1		DGCR2	2
ATP2B3	3		CAMSAP3	1		DGCR5	2
ATP2B4	7		CAMTA1	4		DGKD	6
ATP2C1	16		CAND1	2		DGKH	4
ATP2C2	3		CANX	7		DGKQ	1
ATP4B	2		CAP1	1		DGLUCY	3
ATP5F1B	9		CAPN10	1		DGUOK	2
ATP5MC2	2		CAPN13	6		DHCR24	2
ATP5MC3	2		CAPN15	1		DHCR7	2
ATP5MF	1		CAPN2	2		DHDDS	2
ATP5MG	2		CAPN6	1		DHFR	14
ATP5MJ	1		CAPN7	1		DHFR2	4
ATP5PF	1		CAPN8	2		DHRS3	1
ATP6AP1L	3		CAPRIN1	2		DHRS4	2
ATP6AP2	8		CAPRIN2	1		DHX15	2
ATP6V0A1	3		CAPZA1	1		DHX34	2
ATP6V0A4	4		CAPZA2	4		DHX35	2
ATP6V0C	2		CAPZA3	2		DHX37	2
ATP6V0D2	1		CAPZB	3		DHX38	2
ATP6V0E1	1		CARD10	1		DHX8	2
ATP6V1A	2		CARD11	5		DIAPH1	4
ATP6V1B1	1		CARD17P	1		DIO1	2
ATP6V1B2	1		CARD18	1		DIO3OS	2
ATP6V1C1	8		CARM1	1		DIP2B	6
ATP6V1C2	16		CARMIL1	4		DIP2C	2
ATP6V1D	3		CARMN	1		DIPK1B	2
ATP6V1E1	1		CARNMT1	3		DIPK2A	2
ATP6V1E2	1		CARTPT	3		DIRC1	1
ATP6V1G1	2		CASC15	6		DIS3L	2
ATP6V1H	6		CASC16	2		DISC1	2
ATP7A	6		CASC17	5		DISC1FP1	4
ATP7B	3		CASC18	2		DISP1	2
ATP8A1	7		CASC19	1		DKFZP434A062	2
ATP8A2	9		CASC2	2		DKK2	7
ATP8B1	7		CASC20	2		DLD	2
ATP8B2	3		CASC3	1		DLEC1	2
ATP8B3	4		CASC6	3		DLEU1	4
ATP8B4	3		CASC8	1		DLG2	12
ATP8B5P	1		CASC9	3		DLGAP1	4
ATP9A	3		CASD1	2		DLK1	2
ATP9B	12		CASK	15		DLX2	2
ATPAF1	1		CASP1	1		DLX4	2
ATPSCKMT	7		CASP12	3		DMBX1	2
ATR	5		CASP2	1		DMD	4
ATRN	5		CASP4	1		DMPK	2
ATRNL1	9		CASP7	1		DMRT2	2
ATRX	39		CASP8	2		DMRTB1	2
ATXN1	8		CASS4	1		DNAAF5	2
ATXN10	12		CASZ1	4		DNAAF9	4
ATXN1L	3		CATSPER1	1		DNAH11	2
ATXN2	18		CATSPER2	1		DNAH14	2
ATXN2L	10		CATSPER2P1	1		DNAH2	2
ATXN3	3		CATSPER3	1		DNAH5	6
ATXN7	7		CATSPER4	1		DNAH8	4
ATXN7L1	8		CATSPERB	3		DNAH9	4
ATXN7L3	1		CATSPERE	2		DNAI1	2
ATXN7L3B	12		CATSPERG	1		DNAI4	2
ATXN8OS	4		CAV1	2		DNAJB2	2
AUH	5		CAV3	1		DNAJB6	6
AUNIP	2		CAVIN2	1		DNAJC1	2
AURKA	2		CBFA2T2	5		DNAJC13	2
AURKAP1	6		CBFA2T3	1		DNAJC14	2
AURKC	1		CBFB	2		DNAJC2	1
AUTS2	23		CBLB	7		DNAJC3	2
AVEN	5		CBLL2	4		DNAJC6	4
AVIL	1		CBLN2	8		DNAJC8	1
AVL9	7		CBLN4	2		DNAL4	2
AVPI1	3		CBR4	2		DNHD1	2
AVPR1A	4		CBS	1		DNLZ	2
AWAT1	1		CBX1	1		DNM1	6
AXDND1	9		CBX3	1		DNM1L	2
AXIN1	6		CBX7	1		DNM1P41	4
AXIN2	6		CBY1	1		DNM2	4
AXL	52		CC2D2A	3		DNM3OS	2
AZGP1	1		CCBE1	4		DNMT1	4
AZIN1	7		CCDC102B	1		DNMT3L	2
B2M	2		CCDC112	1		DOC2A	2
B3GALNT1	10		CCDC115	1		DOCK11	2
B3GALNT2	11		CCDC117	1		DOCK2	1
B3GALT1	7		CCDC122	2		DOCK4	2
B3GALT2	1		CCDC125	2		DOCK6	3
B3GALT5	1		CCDC13	1		DOCK9	4
B3GAT1	3		CCDC138	1		DOHH	2
B3GLCT	3		CCDC14	14		DOK6	6
B3GNT2	3		CCDC141	2		DOP1B	2
B3GNT3	1		CCDC144A	1		DPAGT1	1
B3GNT4	1		CCDC144BP	1		DPM1	1
B3GNT7	2		CCDC144NL	1		DPP10	18
B3GNTL1	1		CCDC146	1		DPP4	4
B4GALNT2	4		CCDC148	3		DPP6	2
B4GALNT3	2		CCDC149	2		DPP7	2
B4GALNT4	4		CCDC15	1		DPP9	4
B4GALT3	1		CCDC150	1		DPPA2P3	2
B4GALT5	7		CCDC158	1		DPY19L2	2
B4GALT6	2		CCDC160	2		DPY19L2P4	1
B9D1	2		CCDC162P	2		DPYD	4
B9D2	1		CCDC167	1		DPYSL5	2
BAAT	2		CCDC168	2		DRD4	3
BABAM2	2		CCDC170	2		DRD5	2
BACE1	3		CCDC171	5		DROSHA	2
BACE2	2		CCDC178	2		DSC3	2
BACH1	13		CCDC18	2		DSCAS	2
BACH2	8		CCDC182	3		DSCR4	5
BAD	1		CCDC185	1		DSG2	2
BAG3	2		CCDC186	2		DST	2
BAG4	3		CCDC187	2		DTL	2
BAG6	3		CCDC190	2		DTNA	4
BAGE2	3		CCDC192	1		DTNB	2
BAHCC1	3		CCDC196	2		DTNBP1	1
BAHD1	1		CCDC197	1		DTWD1	2
BAIAP2	5		CCDC198	2		DTX2	4
BAIAP2L1	8		CCDC200	1		DUBR	4
BALR6	5		CCDC26	1		DUSP7	2
BAMBI	3		CCDC30	5		DUXAP9	4
BANCR	1		CCDC32	1		DYDC2	1
BANF2	3		CCDC38	1		DYNC1H1	4
BANK1	7		CCDC39	3		DYNC1I2	2
BANP	9		CCDC40	1		DYNC1LI1	2
BAP1	1		CCDC42	1		DYNC2I1	6
BARD1	6		CCDC57	1		DYNLRB1	2
BARHL1	3		CCDC59	3		DYNLRB2	2
BARX2	5		CCDC6	2		DYNLT2B	4
BASP1	16		CCDC60	2		DYNLT5	2
BATF	1		CCDC61	2		DYRK1A	10
BATF2	1		CCDC66	1		DYRK3	2
BATF3	3		CCDC68	2		DYSF	2
BAX	4		CCDC7	2		E2F1	2
BAZ1A	7		CCDC70	1		E2F2	2
BAZ1B	3		CCDC71	1		E2F7	2
BAZ2A	16		CCDC71L	1		ECEL1	2
BAZ2B	6		CCDC73	1		ECHDC3	2
BBC3	1		CCDC74A	1		EDA	2
BBIP1	1		CCDC74B	1		EDA2R	2
BBOF1	1		CCDC77	1		EDAR	2
BBOX1	1		CCDC80	3		EDARADD	4
BBS10	4		CCDC83	1		EDEM3	2
BBS12	1		CCDC85C	1		EDF1	5
BBS2	1		CCDC86	1		EEF1A1	6
BBS4	1		CCDC88A	5		EEF1AKMT1	2
BBS5	1		CCDC88B	1		EEF1AKMT2	2
BBS7	1		CCDC88C	1		EEF1D	2
BBS9	4		CCDC90B	2		EEF2	4
BBX	14		CCDC91	8		EEF2K	2
BCAM	1		CCDC93	1		EEIG2	2
BCAN	1		CCDST	1		EFCAB11	2
BCAP29	2		CCK	1		EFCAB13	1
BCAR1	2		CCKBR	2		EFCAB2	1
BCAR3	594		CCL19	1		EFCAB5	2
BCAR4	5		CCL20	1		EFHC1	2
BCAS1	3		CCL23	1		EFHC2	2
BCAS2	4		CCL25	1		EFL1	4
BCAS3	12		CCL28	1		EFNA1	2
BCAS4	3		CCL5	4		EFNA5	8
BCAT1	30		CCL7	1		EFR3A	2
BCAT2	4		CCM2	2		EGFL7	2
BCDIN3D	3		CCM2L	1		EGFR	2
BCHE	12		CCNA1	3		EGLN1	2
BCKDHA	1		CCNC	2		EHBP1	2
BCKDHB	7		CCND2	1		EHBP1L1	4
BCL10	3		CCND3	1		EHD1	2
BCL11A	6		CCNE1	1		EHMT1	1
BCL11B	7		CCNE2	1		EIF2AK2	2
BCL2	6		CCNF	1		EIF2AK3	2
BCL2A1	3		CCNG1	1		EIF2B3	2
BCL2L1	73		CCNH	4		EIF2B4	2
BCL2L10	1		CCNI	2		EIF3H	2
BCL2L11	1		CCNJL	4		EIF3IP1	4
BCL2L13	3		CCNL1	4		EIF3J	2
BCL2L2	10		CCNQ	2		EIF4A3	2
BCL3	1		CCNT1	2		EIF4B	4
BCL6	4		CCNT2	2		EIF4E	2
BCL7A	1		CCNY	2		EIF4EBP2	2
BCL7B	1		CCNYL1B	1		EIF4G3	6
BCL7C	1		CCP110	1		EIF5	2
BCL9	1		CCPG1	1		EIF5B	4
BCL9L	10		CCR3	2		EIPR1	5
BCLAF1	19		CCR4	1		ELAC1	2
BCO1	1		CCR9	1		ELAPOR2	2
BCO2	2		CCSER1	11		ELF2	4
BCOR	5		CCSER2	6		ELF4	2
BCORL1	6		CCT3	1		ELL	4
BCORP1	2		CCT4	2		ELL2	2
BCR	7		CCT5	1		ELL3	2
BCRP2	2		CCT6A	3		ELMO1	2
BCS1L	3		CCT6B	1		ELMO2	1
BCYRN1	1		CCT6P3	1		ELMOD1	2
BDH1	3		CCT8	1		ELMOD3	2
BDKRB1	1		CCT8L2	3		ELOA	2
BDKRB2	3		CCZ1	1		ELOVL1	2
BDNF	8		CCZ1B	2		ELOVL6	4
BDP1	14		CD109	2		ELP1	2
BEAN1	4		CD14	1		ELP2	4
BECN1	2		CD160	2		ELP3	2
BECN2	1		CD163	2		EMBP1	2
BEGAIN	4		CD163L1	2		EMC1	2
BEND2	3		CD177	1		EMC10	2
BEND3	5		CD180	1		EMCN	2
BEND3P3	5		CD1A	1		EME1	4
BEND4	9		CD1E	1		EMID1	2
BEND5	7		CD200R1	1		EML5	2
BEND6	1		CD24	1		EMSY	2
BEND7	4		CD28	2		ENAH	2
BEST1	1		CD2AP	3		ENDOD1	2
BEST2	2		CD300E	1		ENDOG	2
BEST3	1		CD302	1		ENOSF1	4
BEST4	1		CD320	1		ENOX1	2
BET1	2		CD36	2		ENOX2	2
BEX1	2		CD38	2		ENPP2	2
BEX3	1		CD40	1		ENTPD4	3
BEX4	1		CD40LG	1		ENTPD5	2
BFAR	1		CD46	3		ENTREP1	2
BFSP1	4		CD47	1		ENY2	2
BFSP2	1		CD53	1		EOGT	2
BGLAP	2		CD58	2		EOMES	4
BGN	2		CD5L	2		EP400	11
BHLHA15	3		CD6	1		EP400P1	2
BHLHA9	4		CD68	1		EPB41	6
BHLHE23	1		CD70	2		EPB41L1	2
BHLHE41	3		CD80	1		EPB41L5	2
BHMT	2		CD83	1		EPC2	4
BHMT2	1		CD86	2		EPHA3	3
BICC1	8		CD8A	2		EPHA6	2
BICD1	17		CD9	2		EPHA8	1
BICD2	7		CD99	3		EPHB1	3
BICDL1	1		CD99L2	3		EPHX2	2
BICDL2	1		CDADC1	1		EPIC1	7
BICRA	4		CDC14A	1		EPM2A	2
BICRAL	7		CDC14B	2		EPN1	2
BID	3		CDC14C	2		EPN2	2
BIK	1		CDC20B	1		EPS15	2
BIN1	3		CDC25C	2		EPSTI1	2
BIN2	2		CDC27	2		ERAP1	6
BIN3	2		CDC40	3		ERBB4	2
BIRC2	19		CDC42BPA	18		ERBIN	2
BIRC5	1		CDC42BPB	2		ERC1	3
BIRC6	42		CDC42EP1	1		ERC2	2
BIVM	1		CDC42EP3	2		ERCC3	2
BLACAT1	1		CDC42EP5	1		ERCC6L2	2
BLACE	1		CDC42SE2	2		ERCC8	2
BLCAP	1		CDC5L	1		ERF	4
BLID	144		CDC7	3		ERGIC1	2
BLK	3		CDC73	1		ERI3	4
BLM	1		CDCA2	2		ERICH1	5
BLMH	2		CDCA5	1		ERICH6B	2
BLNK	2		CDCA7	3		ERMAP	4
BLTP1	12		CDCA7L	1		ERO1A	4
BLTP2	5		CDCP2	1		ERP44	4
BLTP3A	1		CDH1	1		ESPN	2
BLTP3B	2		CDH10	4		ESR1	2
BLVRA	3		CDH11	4		ESRG	2
BLZF1	1		CDH12	10		ESRP2	2
BMAL1	6		CDH13	2		ESRRG	4
BMAL2	2		CDH17	2		ESS2	2
BMERB1	5		CDH18	10		ESYT2	5
BMF	6		CDH19	4		ETFA	4
BMI1	1		CDH2	11		ETFB	3
BMP1	5		CDH20	3		ETS1	2
BMP15	2		CDH22	1		ETV6	2
BMP2	3		CDH23	2		EVA1C	2
BMP2K	6		CDH24	1		EVC2	2
BMP4	7		CDH26	3		EVI5	2
BMP5	1		CDH3	1		EVL	6
BMP6	8		CDH4	2		EVX2	2
BMP7	5		CDH5	4		EWSR1	2
BMPER	11		CDH6	12		EXD3	3
BMPR1A	9		CDH7	5		EXO1	2
BMPR1B	4		CDH8	18		EXOC3L2	1
BMPR2	19		CDH9	6		EXOC4	6
BMS1	1		CDHR3	1		EXOC6	6
BMS1P1	2		CDIN1	1		EXOC7	4
BMS1P14	2		CDK1	4		EXOG	2
BMS1P17	4		CDK13	3		EXOSC1	2
BMS1P20	3		CDK14	13		EYA1	4
BMS1P21	1		CDK15	2		EYA4	7
BMS1P22	3		CDK16	1		EYS	4
BMS1P23	3		CDK17	4		EZH1	2
BMS1P4	2		CDK18	1		EZH2	6
BMT2	2		CDK19	5		F11R	2
BMX	2		CDK20	2		F13B	2
BNC1	9		CDK2AP1	2		FAAP20	1
BNC2	33		CDK5RAP1	1		FADD	2
BNIP1	4		CDK5RAP2	5		FADS1	4
BNIP2	8		CDK6	4		FAF1	9
BNIP3	5		CDK7	1		FAHD2B	2
BNIP3L	3		CDK8	3		FAM107B	2
BOC	3		CDKAL1	14		FAM117A	4
BOD1	1		CDKL2	1		FAM120A	6
BOD1L1	14		CDKL4	1		FAM120B	7
BOLA1	1		CDKL5	3		FAM124B	2
BOLL	3		CDKN1B	1		FAM131A	2
BOP1	2		CDKN2A	2		FAM135A	2
BORA	1		CDKN2AIPNL	1		FAM135B	2
BORCS5	3		CDKN3	4		FAM138E	2
BORCS7	1		CDON	2		FAM138F	2
BPHL	2		CDPF1	3		FAM13A	6
BPI	2		CDR1	1		FAM13C	2
BPIFA4P	2		CDRT15	2		FAM151A	2
BPIFB1	2		CDRT15P3	2		FAM157A	3
BPIFB3	1		CDRT4	3		FAM157B	2
BPIFB4	2		CDRT7	2		FAM161A	2
BPNT2	26		CDRT8	1		FAM170A	2
BPTF	36		CDS2	3		FAM171A1	2
BRAF	1		CDV3	2		FAM178B	8
BRAP	4		CDY1	1		FAM186A	2
BRAT1	1		CDY1B	1		FAM193A	6
BRCA1	4		CDY2A	1		FAM193B	2
BRCA2	3		CDY2B	1		FAM20B	6
BRD1	7		CDYL	1		FAM210A	1
BRD10	9		CDYL2	1		FAM222B	5
BRD2	11		CEACAM1	3		FAM230A	2
BRD3	7		CEACAM18	1		FAM230B	2
BRD3OS	2		CEBPA	1		FAM230C	4
BRD4	27		CEBPG	1		FAM230D	2
BRD7	3		CEBPZ	1		FAM230E	2
BRD7P3	2		CECR2	5		FAM230G	2
BRD8	1		CECR3	1		FAM230H	2
BRD9	2		CEDORA	2		FAM234B	2
BRDT	4		CELA2A	1		FAM239C	2
BRDTP1	7		CELA3A	1		FAM240B	3
BRF1	4		CELA3B	1		FAM241B	2
BRI3	3		CELF1	5		FAM242B	5
BRINP1	7		CELF2	2		FAM242D	2
BRINP2	1		CELF4	4		FAM246A	2
BRINP3	2		CELF5	2		FAM246B	2
BRIP1	5		CELSR2	1		FAM27E3	3
BRK1	1		CEMIP2	5		FAM30B	2
BRME1	1		CENATAC	1		FAM3C	2
BRMS1L	5		CENPC	4		FAM47B	2
BRPF1	2		CENPE	4		FAM47C	2
BRPF3	2		CENPF	7		FAM53A	4
BRSK2	6		CENPH	1		FAM53B	4
BRWD1	10		CENPI	2		FAM66C	2
BRWD3	7		CENPJ	2		FAM78A	4
BSCL2	7		CENPK	4		FAM83B	4
BSDC1	1		CENPN	1		FAM83D	2
BSG	2		CENPO	2		FAM87B	1
BSND	2		CENPP	2		FAM88E	2
BST1	2		CENPT	2		FAM89A	4
BTAF1	3		CENPU	2		FAM8A1	2
BTBD1	4		CENPVL1	1		FAM95B1	1
BTBD10	6		CENPVL2	1		FAN1	2
BTBD16	1		CENPW	2		FANCA	4
BTBD18	1		CEP112	5		FANCC	2
BTBD19	1		CEP120	3		FANCD2	2
BTBD2	2		CEP126	2		FANCE	2
BTBD3	4		CEP128	10		FANCL	4
BTBD7	1		CEP135	3		FAR2P1	2
BTBD8	5		CEP152	5		FARP2	6
BTBD9	3		CEP162	4		FARS2	1
BTC	2		CEP164	2		FASN	4
BTD	4		CEP170	4		FASTK	2
BTF3	2		CEP170P1	1		FASTKD2	2
BTF3L4	1		CEP192	1		FASTKD5	1
BTG2	1		CEP20	1		FAT1	2
BTG3	2		CEP290	4		FAT3	2
BTK	2		CEP295	1		FAT4	4
BTLA	1		CEP350	4		FBH1	5
BTN1A1	2		CEP43	1		FBLN2	2
BTN2A1	1		CEP44	2		FBXL17	2
BTN2A3P	1		CEP57	2		FBXL2	2
BTN3A1	1		CEP63	1		FBXL20	4
BTNL10P	1		CEP70	3		FBXO10	2
BTNL9	4		CEP78	2		FBXO11	6
BTRC	4		CEP83	7		FBXO22	2
BUB1	3		CEP85	1		FBXO30	2
BUB1B	4		CEP85L	4		FBXO31	2
BUB3	4		CEP95	3		FBXO4	2
BUD13	2		CEPT1	2		FBXO48	2
BUD31	2		CERCAM	1		FBXO7	2
BZW1	12		CERKL	1		FBXW11	2
BZW2	6		CERNA2	1		FBXW4	6
C1D	1		CERS3	1		FBXW4P1	5
C1GALT1	2		CERS4	2		FBXW7	2
C1GALT1C1	3		CERS5	1		FBXW9	3
C1GALT1C1L	2		CERS6	3		FCER1A	2
C1QBP	1		CERT1	3		FCGBP	2
C1QL1	1		CES1	2		FCGR2A	7
C1QL2	2		CES1P1	1		FCGR2B	2
C1QL3	8		CES2	1		FCHO1	2
C1QTNF1	2		CETN2	1		FCHO2	4
C1QTNF12	1		CETN3	2		FCHSD2	4
C1QTNF3	17		CFAP126	1		FDFT1	2
C1QTNF4	3		CFAP144	1		FDPS	2
C1QTNF7	2		CFAP144P1	2		FECH	3
C1QTNF8	3		CFAP144P2	1		FER	2
C1RL	1		CFAP20DC	12		FERMT2	2
C1S	2		CFAP251	1		FGD2	2
C2	1		CFAP263	2		FGF13	10
C2CD2	8		CFAP299	5		FGF16	2
C2CD2L	2		CFAP36	1		FGF18	2
C2CD3	1		CFAP418	1		FGF22	2
C2CD4A	1		CFAP43	2		FGF23	2
C2CD4B	2		CFAP44	1		FGF7P3	1
C2CD4C	3		CFAP45	1		FGF8	4
C2CD5	6		CFAP46	5		FGFR1	2
C3	1		CFAP47	4		FGFR1OP2	2
C3P1	3		CFAP52	2		FGFR2	2
C4BPA	2		CFAP57	1		FHIT	4
C5	1		CFAP61	2		FHL1	2
C5AR1	4		CFAP69	1		FHOD3	2
C5AR2	1		CFAP70	2		FIBIN	2
C6	2		CFAP74	1		FILIP1L	4
C7	1		CFAP77	1		FILNC1	4
C8A	3		CFAP92	1		FIP1L1	2
CA1	3		CFAP97	1		FIRRE	2
CA10	13		CFAP99	1		FKBP10	2
CA12	1		CFDP1	6		FKBP1C	4
CA14	2		CFH	2		FKBP5	2
CA3	1		CFHR3	1		FKBP6P1	2
CA4	1		CFHR5	1		FKTN	2
CA5A	4		CFL2	2		FLJ12825	2
CA5B	1		CFTR	3		FLJ36000	8
CA6	1		CGA	1		FLJ38576	2
CA7	2		CGNL1	1		FLJ40288	2
CA8	3		CH25H	1		FLNA	6
CA9	2		CHASERR	2		FLNC	2
CAAP1	5		CHCHD1	1		FLOT2	2
CAB39	18		CHCHD4	1		FLT3LG	3
CABCOCO1	1		CHCHD6	2		FLT4	2
CABIN1	5		CHCHD7	1		FLVCR2	3
CABLES1	5		CHD1	4		FMN1	2
CABLES2	1		CHD1L	5		FN3KRP	1
CABP1	1		CHD2	9		FNDC3B	12
CABP2	3		CHD5	2		FNTA	2
CABP4	2		CHD6	1		FOS	2
CABP5	1		CHD7	3		FOSL2	2
CABP7	9		CHD8	1		FOXA2	2
CACHD1	3		CHD9	3		FOXD4L4	2
CACNA1A	13		CHD9NB	4		FOXJ3	4
CACNA1B	7		CHEK1	1		FOXK1	6
CACNA1C	9		CHEK2	1		FOXK2	3
CACNA1D	10		CHEK2P2	3		FOXL1	2
CACNA1E	10		CHGB	3		FOXO3	2
CACNA1G	2		CHIAP2	1		FOXO4	2
CACNA1H	4		CHID1	1		FOXO6	2
CACNA1I	5		CHIT1	2		FOXP1	4
CACNA1S	3		CHL1	4		FOXP2	2
CACNA2D1	10		CHM	4		FOXQ1	2
CACNA2D2	3		CHML	5		FRA10AC1	2
CACNA2D3	20		CHMP2B	1		FRAS1	4
CACNA2D4	5		CHMP4B	1		FRAT1	2
CACNB1	1		CHMP5	1		FRG1FP	6
CACNB2	6		CHMP7	1		FRG2	2
CACNB3	2		CHN1	4		FRG2B	2
CACNB4	6		CHN2	1		FRG2EP	4
CACNG1	4		CHODL	3		FRMD3	2
CACNG2	2		CHORDC1	3		FRMD4A	6
CACNG4	1		CHP1	1		FRMD5	2
CACNG5	1		CHRDL1	1		FRMD7	2
CACNG6	3		CHRDL2	1		FRMD8	6
CACNG7	2		CHRFAM7A	3		FRRS1	2
CACNG8	1		CHRM1	1		FRY	2
CACTIN	3		CHRM2	1		FRYL	6
CACUL1	4		CHRM3	6		FSCN1	4
CAD	2		CHRM4	1		FSD1L	4
CADM1	9		CHRNA1	1		FSIP1	1
CADM2	4		CHRNA6	1		FSTL5	4
CADM3	2		CHRNA7	6		FTHL18P	2
CADM4	1		CHRNB3	1		FTL	1
CADPS	13		CHROMR	2		FTMT	2
CADPS2	3		CHST1	1		FUBP1	2
CAGE1	1		CHST11	5		FUNDC2P2	2
CALB1	4		CHST12	1		FURIN	2
CALB2	1		CHST15	1		FUS	4
CALCOCO1	1		CHST2	1		FUT10	2
CALCOCO2	3		CHST5	1		FUT6	1
CALCR	4		CHST9	1		FUT8	2
CALCRL	2		CHSY1	1		FXR1	1
CALD1	9		CHSY3	5		FXYD1	4
CALHM1	1		CHTOP	2		FYCO1	3
CALM1	17		CIAPIN1	1		FZD10	2
CALM2	43		CIB2	1		FZD6	2
CALM3	2		CIBAR1	1		FZD7	2
CALML4	1		CIBAR1P2	1		FZD8	1
CALML6	1		CIMAP3	1		G0S2	2
CALN1	20		CIMIP1	1		GAB2	2
CALR	9		CIPC	1		GAB3	6
CALR3	1		CISD1	2		GABBR1	2
CALR4P	1		CISD2	1		GABPB2	1
CALU	5		CIT	2		GABRA2	4
CALY	4		CITED2	2		GABRA6	2
CAMK1	1		CITED4	1		GABRB1	4
CAMK1D	10		CIZ1	1		GABRE	1
CAMK1G	3		CKAP2	1		GABRG2	2
CAMK2A	6		CKAP4	1		GABRG3	2
CAMK2B	2		CKAP5	1		GABRQ	4
CAMK2D	14		CKM	1		GAD2	2
CAMK2G	4		CKMT2	3		GAGE12D	2
CAMK2N1	1		CLASP1	4		GAGE12J	2
CAMK2N2	1		CLASP2	14		GAGE2A	2
CAMK4	3		CLCA1	1		GAK	6
CAMKK2	4		CLCN1	2		GAL	2
CAMKMT	8		CLCN4	5		GALK2	4
CAMKV	1		CLCN7	1		GALM	2
CAMLG	1		CLDN1	2		GALNS	2
CAMSAP1	6		CLDN18	2		GALNT10	4
CAMSAP2	15		CLDN20	1		GALNT11	2
CAMSAP3	1		CLDN24	2		GALNT13	2
CAMTA1	14		CLDN4	1		GALNT16	1
CAMTA2	1		CLDN8	1		GALNT17	3
CAND1	9		CLDND1	2		GALNT2	10
CAND1.11	7		CLEC16A	2		GALNT8	2
CAND2	1		CLEC17A	1		GALNTL5	2
CANT1	5		CLEC1B	1		GALNTL6	4
CANX	29		CLEC2A	1		GAN	4
CAP1	12		CLEC2D	1		GANAB	2
CAP2	3		CLEC2L	1		GAREM1	2
CAPG	4		CLEC3A	1		GARIN1A	4
CAPN1	1		CLEC3B	1		GARIN6	2
CAPN11	2		CLGN	1		GAS1RR	2
CAPN12	1		CLHC1	3		GAS5	2
CAPN15	2		CLIC4	4		GAS6	2
CAPN2	76		CLIC5	3		GAS7	2
CAPN3	6		CLIC6	1		GATA1	5
CAPN5	1		CLINT1	3		GATA2	3
CAPN7	3		CLIP1	2		GATA4	2
CAPN8	5		CLIP2	1		GATM	2
CAPRIN1	18		CLIP3	1		GBF1	4
CAPRIN2	22		CLIP4	4		GBGT1	2
CAPS	1		CLK1	1		GBX2	2
CAPS2	1		CLMN	1		GC	2
CAPZA1	3		CLMP	2		GCC2	2
CAPZA2	4		CLN5	1		GCFC2	2
CAPZA3	2		CLN6	1		GDA	4
CAPZB	9		CLN8	2		GDAP1	4
CARD10	3		CLNK	1		GDF6	1
CARD11	8		CLPB	3		GDF7	2
CARD14	1		CLPTM1	1		GDI2	2
CARD17P	1		CLPX	1		GET4	9
CARD19	2		CLRN1	3		GFM1	2
CARD8	6		CLRN3	3		GFOD1	2
CARD9	5		CLSTN2	1		GFOD2	4
CARHSP1	1		CLTA	1		GFOD3P	2
CARM1	5		CLTC	1		GFRA2	2
CARMAL	2		CLTCL1	1		GGA1	1
CARMIL1	11		CLU	1		GGA2	6
CARMIL3	1		CLUH	1		GGN	2
CARNMT1	2		CLUL1	1		GGNBP2	1
CARS1	9		CLVS1	3		GGPS1	4
CARS2	5		CLVS2	2		GGT2P	2
CARTPT	6		CLXN	3		GGT7	2
CASC11	2		CLYBL	1		GHITM	2
CASC15	19		CMA1	1		GHR	3
CASC16	10		CMAHP	2		GHRLOS	2
CASC17	14		CMAS	1		GHSR	2
CASC18	4		CMC1	7		GINS3	2
CASC2	2		CMC2	1		GIPC1	2
CASC20	4		CMIP	2		GIPC2	4
CASC21	1		CMKLR2	2		GIT1	2
CASC22	1		CMPK1	1		GJA1	2
CASC3	1		CMSS1	3		GJB3	2
CASC6	7		CMTM2	1		GJB6	2
CASC8	4		CMTM3	1		GJD2	2
CASC9	11		CMTM6	1		GJD3	2
CASD1	1		CMTM7	1		GJE1	2
CASK	28		CMTM8	1		GLB1	2
CASKIN1	4		CMTR2	1		GLB1L2	2
CASKIN2	1		CMYA5	2		GLDC	2
CASP10	1		CNBD1	6		GLDN	1
CASP12	5		CNBD2	1		GLG1	2
CASP14	3		CNBP	1		GLI2	2
CASP16P	2		CNEP1R1	1		GLI3	1
CASP3	2		CNGA2	1		GLIPR1	2
CASP8	3		CNGA3	1		GLO1	2
CASP8AP2	1		CNGB1	1		GLRA2	2
CASP9	1		CNGB3	1		GLRB	2
CASQ2	3		CNIH1	1		GLT8D1	2
CASR	3		CNIH3	2		GLUD1P3	2
CASS4	2		CNIH4	1		GLUD2	2
CAST	15		CNKSR1	1		GMDS	2
CASTOR1	1		CNKSR2	5		GMEB1	2
CASTOR2	4		CNMD	1		GMFB	1
CASTOR3P	2		CNN3	1		GMFG	2
CASZ1	16		CNNM1	1		GMIP	2
CAT	1		CNNM2	2		GMNC	2
CATSPER1	1		CNOT1	2		GMNN	2
CATSPER2	2		CNOT10	3		GMPR	4
CATSPER3	2		CNOT2	6		GMPS	2
CATSPERB	3		CNOT6	4		GNA13	2
CATSPERD	3		CNOT6L	2		GNAQ	4
CATSPERE	4		CNOT8	1		GNAS	6
CATSPERG	6		CNOT9	1		GNAZ	2
CAV1	19		CNPY1	2		GNB1	3
CAV2	2		CNPY3	2		GNB2	2
CAV3	1		CNPY4	1		GNG10	2
CAVIN1	11		CNR1	1		GNG7	2
CAVIN4	5		CNST	3		GNGT1	5
CBFA2T2	10		CNTLN	7		GNL3L	4
CBFA2T3	8		CNTN1	3		GNPAT	2
CBFB	10		CNTN2	2		GNPDA1	2
CBL	13		CNTN3	16		GNPDA2	2
CBLB	6		CNTN4	9		GNPTAB	2
CBLC	1		CNTN5	19		GNRH2	2
CBLIF	1		CNTN6	16		GOLGA2P10	2
CBLL2	3		CNTNAP2	19		GOLGA2P7	4
CBLN1	4		CNTNAP3	2		GOLGA3	2
CBLN2	9		CNTNAP3B	3		GOLGA4	2
CBLN4	3		CNTNAP3C	2		GOLGA6L2	2
CBR4	5		CNTNAP3P2	5		GOLGA6L5P	2
CBS	3		CNTNAP4	4		GOLGA6L7	4
CBX1	2		CNTNAP5	8		GOLGA6L9	4
CBX2	1		CNTRL	4		GOLGA7	2
CBX3	3		CNTROB	1		GOLGA8A	1
CBX4	3		COA1	1		GOLGA8B	5
CBX5	6		COA5	8		GOLGA8S	2
CBX6	1		COA6	1		GOLIM4	4
CBX7	2		COA7	2		GOLM1	2
CBX8	3		COA8	1		GOLM2	4
CBY1	2		COBL	5		GOLPH3	2
CBY2	2		COBLL1	2		GOLPH3L	1
CC2D1A	2		COCH	1		GOLT1B	4
CC2D1B	4		COG5	3		GORASP1	2
CC2D2A	1		COG6	2		GOSR2	2
CC2D2B	2		COIL	1		GP2	2
CCAR1	9		COL10A1	1		GP6	1
CCAR2	1		COL11A2	1		GPAM	4
CCAT2	3		COL12A1	5		GPAT4	4
CCBE1	23		COL13A1	2		GPATCH2L	2
CCDC102A	3		COL14A1	3		GPC3	4
CCDC102B	3		COL15A1	1		GPC5	2
CCDC110	1		COL16A1	1		GPC6	2
CCDC115	13		COL17A1	1		GPCPD1	4
CCDC12	1		COL19A1	4		GPD1L	2
CCDC122	2		COL1A1	1		GPD2	2
CCDC124	2		COL20A1	1		GPI	27
CCDC125	5		COL21A1	3		GPR12	1
CCDC126	2		COL22A1	6		GPR142	2
CCDC127	6		COL23A1	5		GPR149	2
CCDC13	1		COL24A1	3		GPR151	2
CCDC134	1		COL25A1	8		GPR156	2
CCDC137	1		COL26A1	2		GPR158	2
CCDC138	1		COL27A1	1		GPR176	2
CCDC14	15		COL28A1	2		GPR22	2
CCDC141	5		COL3A1	1		GPR37	3
CCDC144A	5		COL4A1	2		GPR61	2
CCDC144BP	4		COL4A2	1		GPRC5B	2
CCDC144CP	2		COL4A4	1		GPSM1	4
CCDC144NL	1		COL4A5	3		GPSM2	4
CCDC146	7		COL4A6	5		GRAMD1A	2
CCDC149	1		COL5A1	1		GRAMD1C	2
CCDC15	1		COL5A2	4		GRAP2	2
CCDC152	2		COL5A3	1		GRB10	7
CCDC157	2		COL6A4P2	1		GRB14	2
CCDC158	3		COL6A6	1		GRHL2	2
CCDC160	2		COL8A1	1		GRIA2	2
CCDC162P	4		COLEC10	1		GRIA3	4
CCDC168	1		COLEC12	1		GRID1	2
CCDC169	1		COLGALT2	2		GRID2	2
CCDC170	5		COMETT	3		GRIK1	2
CCDC171	8		COMMD1	1		GRIK2	6
CCDC172	1		COMMD10	7		GRIN2D	7
CCDC174	1		COMMD5	1		GRIP1	6
CCDC175	1		COMMD6	1		GRIPAP1	3
CCDC177	2		COMP	1		GRK7	2
CCDC178	6		COMT	2		GRM1	1
CCDC179	2		COP1	2		GRM7	6
CCDC18	2		COPA	2		GRP	2
CCDC180	1		COPB1	3		GRTP1	1
CCDC181	1		COPB2	1		GSAP	2
CCDC182	3		COPG2	1		GSDME	2
CCDC183	7		COPS2	1		GSE1	46
CCDC185	1		COPS4	1		GSTCD	3
CCDC187	3		COPS7B	2		GSTM1	2
CCDC190	1		COPS8	1		GSTP1	2
CCDC192	2		COPS9	1		GSX1	1
CCDC195	1		COPZ1	1		GTF2F2	2
CCDC196	2		COQ10B	1		GTF2H2	2
CCDC197	1		COQ2	2		GTF2I	2
CCDC200	10		COQ3	1		GTF2IP7	2
CCDC24	2		COQ4	1		GTF2IRD1	2
CCDC25	2		COQ7	1		GTF3A	2
CCDC26	3		COQ8A	3		GTF3C1	2
CCDC28B	1		CORIN	3		GTPBP2	3
CCDC3	7		CORO1C	5		GTPBP4	2
CCDC30	3		CORO2A	2		GTPBP6	7
CCDC32	1		CORO2B	2		GTSE1	2
CCDC33	3		COTL1	1		GUCD1	2
CCDC34	1		COX18	2		GUCY2F	2
CCDC39	2		COX20	9		GUK1	3
CCDC42	2		COX5A	2		GULP1	2
CCDC43	2		COX6C	1		GUSB	2
CCDC47	3		COX7A2L	1		GUSBP1	2
CCDC50	6		COX7B2	2		GUSBP14	6
CCDC51	1		COX7C	1		GUSBP15	5
CCDC57	2		CPA2	1		GUSBP16	1
CCDC59	7		CPA6	7		GUSBP17	4
CCDC6	4		CPAMD8	2		GUSBP19	4
CCDC60	1		CPB1	1		GUSBP3	4
CCDC61	3		CPB2	1		GYG2	3
CCDC62	5		CPD	1		GYPB	2
CCDC63	3		CPE	3		GYPC	10
CCDC65	3		CPEB1	1		GYPE	1
CCDC66	4		CPEB2	3		H2AC6	4
CCDC68	6		CPEB3	2		H2AC7	1
CCDC69	5		CPEB4	1		H2AZ2	2
CCDC7	6		CPED1	2		H2BC11	2
CCDC70	1		CPLANE1	5		H2BC12	2
CCDC71	2		CPLX2	2		H2BC15	2
CCDC73	7		CPM	8		H2BC17	2
CCDC74A	2		CPN2	1		H2BC18	2
CCDC74B	1		CPNE1	3		H2BC6	2
CCDC77	5		CPNE2	1		H2BC8	2
CCDC78	1		CPNE4	7		H3C12	2
CCDC80	38		CPNE8	5		H3C14	2
CCDC82	4		CPNE9	2		H3C15	2
CCDC83	3		CPOX	1		H3C2	2
CCDC85B	35		CPQ	4		H3C8	2
CCDC85C	5		CPS1	5		H4C5	2
CCDC86	2		CPSF1	1		H4C9	2
CCDC88A	8		CPSF6	2		HABP4	2
CCDC88C	4		CPT2	1		HACD1	4
CCDC9	2		CPVL	1		HADH	2
CCDC90B	1		CPXCR1	7		HAFML	6
CCDC91	13		CPXM1	1		HAO2	2
CCDC93	15		CPXM2	2		HAP1	2
CCDC97	2		CR1	1		HAPLN1	2
CCDC9B	52		CR2	1		HAS3	2
CCDST	1		CRABP1	1		HAUS8	2
CCER1	1		CRACD	4		HAVCR1	2
CCIN	1		CRACDL	1		HAVCR1P1	4
CCKAR	2		CRADD	4		HAVCR2	1
CCL1	1		CRAMP1	1		HBBP1	2
CCL11	1		CRAT37	3		HBEGF	4
CCL19	1		CRB1	2		HBM	2
CCL24	1		CRBN	4		HBP1	2
CCL25	3		CREB1	1		HBS1L	2
CCL26	2		CREB3L2	2		HCCS	2
CCL28	3		CREB3L3	1		HCG17	2
CCL4	1		CREB5	19		HCN3	2
CCL4L2	1		CREBBP	4		HDAC3	2
CCL5	1		CREBL2	1		HDAC4	4
CCL8	2		CREBRF	1		HDAC5	4
CCM2	7		CREBZF	1		HDAC6	2
CCM2L	1		CREG2	1		HDAC7	4
CCN1	24		CRELD2	1		HDGF	3
CCN2	2		CREM	7		HDGFL2	1
CCN4	2		CRHBP	2		HDGFL3	3
CCN6	3		CRHR1	1		HDHD2	2
CCNA1	4		CRIM1	6		HDLBP	2
CCNA2	4		CRISP1	1		HDX	2
CCNB1	1		CRISP2	2		HEATR5B	6
CCNB2	1		CRISPLD1	1		HECTD3	2
CCNB3	1		CRISPLD2	1		HECTD4	6
CCNC	3		CRKL	1		HELB	2
CCND1	79		CRLF2	3		HELZ2	4
CCND3	3		CRLF3	1		HEMGN	2
CCNE1	5		CRLS1	3		HERC1	5
CCNE2	1		CRMP1	1		HERC2	6
CCNF	2		CRNDE	1		HERC2P11	2
CCNG1	1		CROCC	1		HERC2P2	2
CCNH	4		CROCCP3	1		HERC2P3	8
CCNI	3		CROT	1		HERC2P4	6
CCNI2	1		CRP	1		HERC2P7	2
CCNJ	1		CRPPA	1		HERC2P9	2
CCNJL	9		CRTAC1	2		HERC3	2
CCNK	3		CRY1	1		HEXA	2
CCNL1	16		CRYAA	1		HEXB	2
CCNL2	9		CRYBA1	4		HEXD	2
CCNP	1		CRYBB2P1	1		HFM1	12
CCNQ	2		CRYBB3	2		HGS	4
CCNT1	7		CRYBG1	2		HHATL	2
CCNT2	5		CRYGN	1		HHLA1	2
CCNY	38		CRYL1	1		HIBADH	1
CCNYL2	1		CRYM	1		HIBCH	2
CCNYL4	1		CRYZL1	1		HIC2	6
CCP110	1		CSDE1	11		HIF1A	2
CCPG1	1		CSE1L	7		HIF1AN	2
CCR10	1		CSF1R	3		HINT1	4
CCR2	1		CSF2RA	1		HIPK1	1
CCR3	2		CSF3R	3		HIPK2	4
CCR4	2		CSGALNACT1	1		HIRA	7
CCR5	1		CSGALNACT2	2		HIVEP3	2
CCR5AS	1		CSMD1	20		HJV	2
CCR6	1		CSMD2	1		HK1	6
CCR7	3		CSMD3	23		HK2	2
CCR8	1		CSN1S1	1		HLF	2
CCSAP	3		CSN1S2AP	1		HMBOX1	2
CCSER1	7		CSN3	1		HMCN1	2
CCSER2	11		CSNK1A1	2		HMGB1	4
CCT2	2		CSNK1A1L	2		HMGB2	2
CCT3	6		CSNK1D	2		HMGB3	4
CCT4	5		CSNK1G1	3		HMGCL	1
CCT5	5		CSNK1G3	5		HMGN2	2
CCT6A	6		CSNK2A1	5		HNF4G	3
CCT6B	1		CSNK2A3	2		HNRNPA2B1	6
CCT6P3	2		CSPG4P1Y	2		HNRNPD	8
CCT7	2		CSPG5	2		HNRNPF	2
CCT8	1		CSPP1	2		HNRNPH1	4
CCT8L2	3		CSRNP3	1		HNRNPH3	4
CCZ1	3		CST3	1		HNRNPL	7
CCZ1B	3		CST6	1		HNRNPM	5
CD101	2		CST7	1		HNRNPR	2
CD109	3		CSTF2	1		HNRNPU	4
CD14	2		CSTF2T	5		HNRNPUL1	6
CD151	1		CSTF3	4		HOMER2	2
CD163L1	2		CSTPP1	6		HOOK2	2
CD164	10		CT45A1	1		HOOK3	2
CD177	4		CT45A2	1		HOXC6	2
CD180	2		CT45A3	2		HOXC9	2
CD19	1		CT45A5	1		HP1BP3	2
CD1A	2		CT45A6	1		HPCAL1	4
CD1C	1		CT45A7	1		HPR	1
CD1D	3		CT45A8	1		HPS5	2
CD2	1		CT45A9	1		HPSE2	2
CD200	1		CT47B1	2		HRAS	2
CD200R1	1		CT55	1		HS2ST1	2
CD200R1L	2		CT62	1		HS3ST1	2
CD207	1		CT66	1		HS6ST1	3
CD22	2		CT70	1		HSALR1	4
CD226	2		CT83	7		HSD17B11	2
CD24	2		CTAGE1	2		HSD17B12	2
CD244	1		CTAGE11P	2		HSD52	2
CD247	1		CTAGE15	1		HSDL2	2
CD27	3		CTBP2	5		HSF2	6
CD276	6		CTCFL	1		HSP90AB1	2
CD28	5		CTDSP2	1		HSP90B1	1
CD2AP	8		CTDSPL	2		HSPA13	2
CD2BP2	2		CTH	8		HSPA1A	4
CD300A	2		CTHRC1	1		HSPA1B	1
CD300E	2		CTIF	2		HSPA1L	2
CD300LB	2		CTNNA1	4		HSPA4	2
CD300LF	1		CTNNA2	6		HSPA4L	2
CD300LG	2		CTNNA3	14		HSPA6	2
CD302	1		CTNNAL1	1		HSPA7	2
CD320	1		CTNNB1	4		HSPG2	6
CD33	1		CTNNBL1	3		HTR1B	4
CD36	3		CTNND2	21		HTR2A	2
CD38	5		CTPS2	1		HTT	8
CD40	1		CTSB	1		HUS1B	2
CD40LG	2		CTSC	1		HUWE1	4
CD44	143		CTSL	1		HYCC1	2
CD46	21		CTSL3P	1		HYCC2	2
CD47	5		CTSO	4		IAH1	2
CD48	2		CTSV	3		IARS1	4
CD5	3		CTTNBP2	1		ICA1L	2
CD52	1		CTTNBP2NL	2		ICE1	4
CD53	1		CTXN3	1		ID4	2
CD55	20		CUBN	2		IDS	2
CD58	2		CUL1	1		IFITM10	2
CD59	19		CUL3	5		IFNA5	2
CD5L	1		CUL4A	1		IFNAR2	2
CD6	2		CUL5	3		IFNE	2
CD63	4		CUX1	4		IFNGR2	2
CD69	2		CUX2	2		IFT43	4
CD7	1		CWC22	2		IFT57	2
CD70	5		CWC27	4		IFT81	2
CD74	1		CWF19L1	1		IGBP1P1	1
CD79B	2		CWF19L2	9		IGDCC3	2
CD80	1		CWH43	5		IGF1	10
CD81	2		CX3CR1	1		IGF1R	5
CD82	4		CXADR	1		IGF2BP3	6
CD83	2		CXADRP3	1		IGF2R	4
CD86	2		CXCL13	1		IGFL2	4
CD8A	2		CXCR1	1		IGFL3	2
CD8B2	5		CXCR4	2		IGSF21	4
CD9	11		CXXC1	1		IGSF6	2
CD96	4		CXXC1P1	1		IKBKB	2
CD99	2		CXXC4	1		IKZF1	2
CD99L2	3		CYB5A	1		IL10RB	2
CDADC1	2		CYB5B	1		IL13RA2	2
CDAN1	4		CYB5D2	1		IL15RA	2
CDC123	3		CYCSP52	2		IL17F	2
CDC14A	1		CYFIP1	1		IL1F10	2
CDC14B	2		CYFIP2	1		IL1RAPL1	6
CDC14C	2		CYLC1	3		IL2RA	2
CDC16	3		CYLC2	1		IL31RA	2
CDC20	1		CYP11A1	1		IL6ST	2
CDC23	2		CYP19A1	1		ILK	2
CDC25A	1		CYP1A1	1		ILKAP	2
CDC25B	1		CYP26A1	2		ILRUN	2
CDC25C	1		CYP26B1	4		IMMP1L	2
CDC26	3		CYP27C1	1		IMMP2L	15
CDC27	13		CYP2A6	1		IMPDH1	2
CDC34	1		CYP2A7	1		INAFM1	2
CDC37	5		CYP2B6	1		INCENP	2
CDC37L1	1		CYP2C18	1		INF2	2
CDC40	3		CYP2C19	1		ING3	2
CDC42	11		CYP2C8	2		INO80	4
CDC42BPA	38		CYP2C9	1		INO80D	2
CDC42BPB	25		CYP2D7	1		INPP4A	2
CDC42BPG	2		CYP2E1	1		INPP4B	2
CDC42EP1	2		CYP2F1	1		INPP5A	1
CDC42EP2	1		CYP2S1	1		INPP5B	2
CDC42EP3	21		CYP39A1	1		INPPL1	2
CDC42EP4	2		CYP3A7	1		INSIG2	1
CDC42EP5	1		CYP4B1	1		INSYN2B	2
CDC42P3	1		CYP4F11	1		INTS1	1
CDC42SE1	5		CYP4F29P	1		INTS3	2
CDC42SE2	5		CYP4F3	1		INTS4P2	2
CDC45	1		CYP4F30P	2		INTS6	4
CDC5L	1		CYP4F35P	2		INTS9	4
CDC6	1		CYP4F62P	1		IPCEF1	2
CDC7	5		CYP4F8	1		IPO11	2
CDC73	1		CYRIA	3		IPO7	2
CDCA2	2		CYRIB	3		IPP	2
CDCA3	1		CYSLTR1	2		IQCF3	2
CDCA4	14		CYTH1	1		IQGAP2	2
CDCA7	4		CYTH2	1		IQGAP3	2
CDCA7L	10		CYTIP	2		IQSEC1	4
CDCA8	1		CYTL1	1		IQSEC2	2
CDCP1	30		CYTOR	5		IQUB	3
CDCP2	2		CYYR1	1		IRAIN	2
CDH1	2		D21S2088E	2		IRF1	2
CDH10	5		D2HGDH	1		IRF3	2
CDH11	9		DAAM1	1		IRS2	2
CDH12	11		DAAM2	2		IRS4	12
CDH13	4		DAB1	6		IRX1	2
CDH15	1		DAB2IP	1		IRX5	2
CDH17	5		DACH1	15		ISG20L2	2
CDH18	17		DACH2	8		IST1	2
CDH19	9		DACT2	1		ISYNA1	4
CDH2	8		DACT3	1		ITCH	4
CDH20	9		DAD1	1		ITFG1	7
CDH22	7		DAGLA	1		ITGA5	2
CDH23	9		DAGLB	2		ITGA6	2
CDH26	1		DANT1	1		ITGA7	2
CDH3	1		DANT2	6		ITGA8	2
CDH4	22		DAOA	2		ITGAV	2
CDH5	7		DAPK2	1		ITGB1	4
CDH6	12		DAPP1	1		ITGB3	2
CDH7	8		DARS1	2		ITGB5	2
CDH8	25		DARS2	1		ITGB7	1
CDH9	11		DAZ1	3		ITGBL1	2
CDHR1	1		DAZAP2	1		ITIH6	2
CDHR18P	3		DBF4	1		ITM2C	2
CDHR2	4		DBIL5P2	3		ITPR1	2
CDIN1	11		DBR1	1		ITPR2	4
CDIP1	1		DBT	1		ITPRID1	2
CDIPT	2		DBX2	1		ITPRIP	4
CDK1	1		DCAF10	2		ITSN1	2
CDK10	2		DCAF11	1		IWS1	2
CDK11A	4		DCAF12L1	8		IYD	2
CDK11B	2		DCAF12L2	1		IZUMO3	4
CDK12	7		DCAF13	3		JADE1	4
CDK13	7		DCAF13P3	2		JADE3	2
CDK14	6		DCAF16	1		JAK1	4
CDK15	2		DCAF17	2		JAK2	3
CDK16	1		DCAF4L2	4		JARID2	5
CDK17	32		DCAF5	4		JAZF1	2
CDK18	4		DCAF6	4		JMJD1C	2
CDK19	8		DCAF7	1		JOSD2	2
CDK2	1		DCAF8	5		JPH3	2
CDK20	1		DCAF8L1	3		JPH4	2
CDK2AP1	6		DCAF8L2	1		JPT2	2
CDK2AP2	1		DCAKD	1		JPX	4
CDK5RAP1	2		DCBLD1	1		JRKL	1
CDK5RAP2	45		DCBLD2	4		JSRP1	2
CDK5RAP3	1		DCC	7		JUN	2
CDK6	47		DCDC1	6		KALRN	2
CDK7	1		DCDC2	1		KANK1	1
CDK8	5		DCDC2C	1		KANK4	2
CDK9	2		DCHS1	1		KANSL1	7
CDKAL1	5		DCHS2	3		KANSL3	2
CDKL1	5		DCK	2		KAT2A	1
CDKL2	2		DCLK1	3		KAT2B	2
CDKL5	9		DCLK2	4		KAT6A	6
CDKN1A	12		DCLK3	3		KAT6B	2
CDKN1C	2		DCLRE1C	1		KATNA1	4
CDKN2AIP	3		DCLRE1CP1	1		KC6	4
CDKN2D	1		DCP2	3		KCNAB1	4
CDKN3	3		DCPS	1		KCNAB2	3
CDNF	2		DCSTAMP	1		KCNB2	2
CDO1	1		DCT	1		KCNC1	1
CDON	5		DCTD	1		KCNC2	6
CDPF1	1		DCTN2	1		KCNC3	2
CDR1	1		DCTN4	1		KCNC4	2
CDR2	2		DCUN1D3	1		KCNF1	2
CDR2L	2		DCUN1D4	1		KCNH1	4
CDRT15	2		DCUN1D5	1		KCNH5	10
CDRT15L2	6		DCX	1		KCNIP2	2
CDRT15P3	4		DDA1	1		KCNIP4	2
CDRT4	5		DDAH1	1		KCNJ15	3
CDRT7	1		DDB1	2		KCNJ2	4
CDRT8	1		DDB2	1		KCNK1	2
CDS2	4		DDHD1	2		KCNK13	1
CDSN	1		DDHD2	1		KCNK5	2
CDV3	22		DDIAS	1		KCNK9	2
CDX2	2		DDIT4	1		KCNMA1	2
CDX4	3		DDIT4L	2		KCNMB2	4
CDY1B	2		DDR1	1		KCNN4	2
CDY2A	4		DDR2	3		KCNQ1OT1	4
CDYL	10		DDX1	2		KCNQ4	2
CDYL2	42		DDX10	6		KCNQ5	7
CEACAM1	3		DDX11	2		KCNT1	2
CEACAM16	1		DDX12P	3		KCNU1	2
CEACAM20	1		DDX17	15		KCP	2
CEACAM21	3		DDX18	1		KCTD1	2
CEACAM3	1		DDX19B	1		KCTD16	2
CEACAM4	1		DDX21	4		KCTD19	2
[truncated: 12,830 more rows]
