# Supplementary material for: Isoform switching of CD47 induces macrophage-initiated cancer cell pyroptosis
Source: Research Square preprint supplement (doi:10.21203/rs.3.rs-6981061/v1), 2025-08-08
Supplement: Supplementary file 4 [file 6d9e619e2e3a1193ff768338.xlsx]

## Sheet: Spatial transcriptome
Supplementary Table 3 scRNA-seq datasets
Sample	Study	BioProject	GSE_ID	SRR_ID	GSM_ID	TISSUE	Description
ER1	Elaine Stur, et al.	PRJNA784634	GSE189843	SRR17068933	GSM5708485	high-grade serous ovarian tumor	Excellent
ER2	Elaine Stur, et al.	PRJNA784634	GSE189843	SRR17068934	GSM5708486	high-grade serous ovarian tumor	Excellent
ER3	Elaine Stur, et al.	PRJNA784634	GSE189843	SRR17068935	GSM5708487	high-grade serous ovarian tumor	Excellent
ER4	Elaine Stur, et al.	PRJNA784634	GSE189843	SRR17068936	GSM5708488	high-grade serous ovarian tumor	Excellent
ER5	Elaine Stur, et al.	PRJNA784634	GSE189843	SRR17068937	GSM5708489	high-grade serous ovarian tumor	Excellent
ER6	Elaine Stur, et al.	PRJNA784634	GSE189843	SRR17068938	GSM5708490	high-grade serous ovarian tumor	Excellent
PR1	Elaine Stur, et al.	PRJNA784634	GSE189843	SRR17068939	GSM5708491	high-grade serous ovarian tumor	Poor
PR2	Elaine Stur, et al.	PRJNA784634	GSE189843	SRR17068940	GSM5708492	high-grade serous ovarian tumor	Poor
PR3	Elaine Stur, et al.	PRJNA784634	GSE189843	SRR17068941	GSM5708493	high-grade serous ovarian tumor	Poor
PR4	Elaine Stur, et al.	PRJNA784634	GSE189843	SRR17068942	GSM5708494	high-grade serous ovarian tumor	Poor
PR5	Elaine Stur, et al.	PRJNA784634	GSE189843	SRR17068943	GSM5708495	high-grade serous ovarian tumor	Poor
PR6	Elaine Stur, et al.	PRJNA784634	GSE189843	SRR17068944	GSM5708496	high-grade serous ovarian tumor	Poor
NR1	Ju H, et al.	PRJNA1099922	GSE263920	SRR28674076	GSM8207499	high-grade serous ovarian tumor	Non-recurrent
NR2	Ju H, et al.	PRJNA1099922	GSE263920	SRR28674075	GSM8207500	high-grade serous ovarian tumor	Non-recurrent
NR3	Ju H, et al.	PRJNA1099922	GSE263920	SRR28674074	GSM8207501	high-grade serous ovarian tumor	Non-recurrent
R1	Ju H, et al.	PRJNA1099922	GSE263920	SRR28674073	GSM8207502	high-grade serous ovarian tumor	Recurrent
R2	Ju H, et al.	PRJNA1099922	GSE263920	SRR28674072	GSM8207503	high-grade serous ovarian tumor	Recurrent
R3	Ju H, et al.	PRJNA1099922	GSE263920	SRR28674071	GSM8207504	high-grade serous ovarian tumor	Recurrent
R4	Ju H, et al.	PRJNA1099922	GSE263920	SRR28674070	GSM8207505	high-grade serous ovarian tumor	Recurrent
R5	Ju H, et al.	PRJNA1099922	GSE263920	SRR28674069	GSM8207506	high-grade serous ovarian tumor	Recurrent
P1	Denisenko E, et al.	PRJNA873051	GSE211956	SRR21230126,SRR21230127	GSM6506110	high-grade serous ovarian tumor	poor_response
P2	Denisenko E, et al.	PRJNA873051	GSE211956	SRR21230124,SRR21230125	GSM6506111	high-grade serous ovarian tumor	good_response
P3	Denisenko E, et al.	PRJNA873051	GSE211956	SRR21230123,SRR21230122	GSM6506112	high-grade serous ovarian tumor	good_response
P4	Denisenko E, et al.	PRJNA873051	GSE211956	SRR21230118,SRR21230117	GSM6506113	high-grade serous ovarian tumor	partial_response
P5	Denisenko E, et al.	PRJNA873051	GSE211956	SRR21230119,SRR21230120	GSM6506114	high-grade serous ovarian tumor	good_response
P6	Denisenko E, et al.	PRJNA873051	GSE211956	SRR21230113,SRR21230114	GSM6506115	high-grade serous ovarian tumor	partial_response
P7	Denisenko E, et al.	PRJNA873051	GSE211956	SRR21230112,SRR21230115	GSM6506116	high-grade serous ovarian tumor	poor_response
P8	Denisenko E, et al.	PRJNA873051	GSE211956	SRR21230116,SRR21230121	GSM6506117	high-grade serous ovarian tumor	poor_response
OVCS1	This study.					high-grade serous ovarian tumor

## Sheet: Single cell RNA-seq
Supplementary Table 4 spatial transcriptomes datasets
Sample	Study	BioProject	GSE_ID	SRR_ID	GSM_ID	TISSUE	Description
T59	Starr TK, et al	PRJNA646754	GSE154600	SRR12244038	GSM4675273	high-grade serous ovarian cancer
T61	Starr TK, et al	PRJNA646754	GSE154600	SRR12244039	GSM4675274	high-grade serous ovarian cancer
T76	Starr TK, et al	PRJNA646754	GSE154600	SRR12244040	GSM4675275	high-grade serous ovarian cancer
T89	Starr TK, et al	PRJNA646754	GSE154600	SRR12244041	GSM4675276	high-grade serous ovarian cancer
T90	Starr TK, et al	PRJNA646754	GSE154600	SRR12244042	GSM4675277	high-grade serous ovarian cancer
HGSOC1	Junfen Xu, et al	PRJNA766716	GSE184880	SRR16093349-SRR16093356	GSM5599225	high-grade serous ovarian cancer
HGSOC2	Junfen Xu, et al	PRJNA766716	GSE184880	SRR16093357-SRR16093360	GSM5599226	high-grade serous ovarian cancer
HGSOC3	Junfen Xu, et al	PRJNA766716	GSE184880	SRR16093361-SRR16093364	GSM5599227	high-grade serous ovarian cancer
HGSOC4	Junfen Xu, et al	PRJNA766716	GSE184880	SRR16093365-SRR16093368	GSM5599228	high-grade serous ovarian cancer
HGSOC5	Junfen Xu, et al	PRJNA766716	GSE184880	SRR16093369-SRR16093380	GSM5599229	high-grade serous ovarian cancer
HGSOC6	Junfen Xu, et al	PRJNA766716	GSE184880	SRR16093381-SRR16093384	GSM5599230	high-grade serous ovarian cancer
HGSOC7	Junfen Xu, et al	PRJNA766716	GSE184880	SRR16093385-SRR16093388	GSM5599231	high-grade serous ovarian cancer
Y2	Denisenko E, et al.	PRJNA873051	GSE211956	SRR21230132,SRR21230133	GSM6506105	high-grade serous ovarian cancer
Y3	Denisenko E, et al.	PRJNA873051	GSE211956	SRR21230130,SRR21230131	GSM6506106	high-grade serous ovarian cancer
Y5	Denisenko E, et al.	PRJNA873051	GSE211956	SRR21230128,SRR21230129	GSM6506107	high-grade serous ovarian cancer
MJ10	Denisenko E, et al.	PRJNA873051	GSE211956	SRR21230142-SRR21230149	GSM6506108	high-grade serous ovarian cancer
MJ11	Denisenko E, et al.	PRJNA873051	GSE211956	SRR21230134-SRR21230141	GSM6506109	high-grade serous ovarian cancer
M419CD45neg	Mellors JW, et al	PRJNA971598	GSE232314	SRR24512444	GSM7325725	high-grade serous ovarian cancer	M419
M419CD45pos	Mellors JW, et al	PRJNA971598	GSE232314	SRR24512445	GSM7325726	high-grade serous ovarian cancer	M419
M509CD45neg	Mellors JW, et al	PRJNA971598	GSE232314	SRR24512446	GSM7325727	high-grade serous ovarian cancer	M509
M509CD45pos	Mellors JW, et al	PRJNA971598	GSE232314	SRR24512447	GSM7325728	high-grade serous ovarian cancer	M509
GSM4810692	Nieto P, et al	PRJNA666613	GSE158803	SRR12746726,SRR12746727	GSM4810692	ovarian adenocarcinoma
FT5414	Dinh HQ, et al	PRJNA635138	GSE151214	SRR11909345	GSM4568675	Fallopian tube (Fimbria)	cancer-free
FT_SA23505	Dinh HQ, et al	PRJNA635138	GSE151214	SRR11909347	GSM4568677	Fallopian tube (Fimbria)	cancer-free
FT_SA23508	Dinh HQ, et al	PRJNA635138	GSE151214	SRR11909351	GSM4568681	Fallopian tube (Fimbria)	cancer-free
FT_SA23514	Dinh HQ, et al	PRJNA635138	GSE151214	SRR11909352	GSM4568682	Fallopian tube (Fimbria)	cancer-free
FT_SA24027	Dinh HQ, et al	PRJNA635138	GSE151214	SRR11909355	GSM4568685	Fallopian tube (Fimbria)	cancer-free
