# Supplementary material for: Isoform switching of CD47 induces macrophage-initiated cancer cell pyroptosis
Source: Research Square preprint supplement (doi:10.21203/rs.3.rs-6981061/v1), 2025-08-08
Supplement: Supplementary file 5 [file 9370ef79406d238697391add.xlsx]

## Sheet: Sequences informaton
Supplementary Table 4 Sequence and Adaptor Information
Name	Sequence (5′ - 3′)
scMicroAS-seq
scAS-CD47-p1f	ACACTCTTTCCCTACACGACGCTCTTCCGATCT
scAS-CD47-p1r-r	GTGACTGGAGTTCAGACGTGTGCTCTTCCGATCTGAAATTTGTGGCTTCCAATCA
scASseq-PCR2-F1	AATGATACGGCGACCACCGAGATCTACACTATAGCCTACACTCTTTCCCTACACGAC
scASseq-PCR2-F2	AATGATACGGCGACCACCGAGATCTACACATAGAGGCACACTCTTTCCCTACACGAC
scASseq-PCR2-F3	AATGATACGGCGACCACCGAGATCTACACCCTATCCTACACTCTTTCCCTACACGAC
scASseq-PCR2-R1	CAAGCAGAAGACGGCATACGAGATTCGCCTTAGTGACTGGAGTTCAGACGTG
scASseq-PCR2-R2	CAAGCAGAAGACGGCATACGAGATCTAGTACGGTGACTGGAGTTCAGACGTG
scASseq-PCR2-R3	CAAGCAGAAGACGGCATACGAGATTTCTGCCTGTGACTGGAGTTCAGACGTG
MicroAS-seq
AS-CD47-p1f1	TCGGCAGCGTCAGATGTGTATAAGAGACAGATCACGATGCATGGCCCTCTTCTGAT
AS-CD47-p1f2	TCGGCAGCGTCAGATGTGTATAAGAGACAGCGATGTATGCATGGCCCTCTTCTGAT
AS-CD47-p1f3	TCGGCAGCGTCAGATGTGTATAAGAGACAGTTAGGCTATGCATGGCCCTCTTCTGAT
AS-CD47-p1f4	TCGGCAGCGTCAGATGTGTATAAGAGACAGTGACCATATGCATGGCCCTCTTCTGAT
AS-CD47-p1f5	TCGGCAGCGTCAGATGTGTATAAGAGACAGACAGTGGTATGCATGGCCCTCTTCTGAT
AS-CD47-p1f6	TCGGCAGCGTCAGATGTGTATAAGAGACAGGCCAATGTATGCATGGCCCTCTTCTGAT
AS-CD47-p1r1	CGTGGGCTCGGAGATGTGTATAAGAGACAGCTTGTACATCAAGGCCATGGTGCTTA
AS-CD47-p1r2	CGTGGGCTCGGAGATGTGTATAAGAGACAGGGCTACCATCAAGGCCATGGTGCTTA
AS-CD47-p1r3	CGTGGGCTCGGAGATGTGTATAAGAGACAGTAGCTTACATCAAGGCCATGGTGCTTA
AS-CD47-p1r4	CGTGGGCTCGGAGATGTGTATAAGAGACAGGATCAGACATCAAGGCCATGGTGCTTA
AS-CD47-p1r5	CGTGGGCTCGGAGATGTGTATAAGAGACAGACTTGATCCATCAAGGCCATGGTGCTTA
AS-CD47-p1r6	CGTGGGCTCGGAGATGTGTATAAGAGACAGCAGATCTCCATCAAGGCCATGGTGCTTA
ASseq-PCR2-F1	AATGATACGGCGACCACCGAGATCTACACAGCGCTAGTCGTCGGCAGCGTCAGATG
ASseq-PCR2-F2	AATGATACGGCGACCACCGAGATCTACACGATATCGATCGTCGGCAGCGTCAGATG
ASseq-PCR2-F3	AATGATACGGCGACCACCGAGATCTACACCGCAGACGTCGTCGGCAGCGTCAGATG
ASseq-PCR2-R1	CAAGCAGAAGACGGCATACGAGATGTGAATATGTCTCGTGGGCTCGGAGATG
ASseq-PCR2-R2	CAAGCAGAAGACGGCATACGAGATACAGGCGCGTCTCGTGGGCTCGGAGATG
ASseq-PCR2-R3	CAAGCAGAAGACGGCATACGAGATCATAGAGTGTCTCGTGGGCTCGGAGATG
qPCR
RACK1-qPCR-F	GAACCTGGCTAACTGCAAGC
RACK1-qPCR-R	GGGATCCATCTGGAGAGACA
RAB32-qPCR-F	CTCTTCTCCCAGCACTACCG
RAB32-qPCR-R	AGCACCAACAGCTTCCTTGT
TCP1-qPCR-F	TGCTGTAGAAGCAGCCCTTT
TCP1-qPCR-R	TGGGCCTCATTATGAAAAGC
RPS2-qPCR-F	CCACCTTTGATGCCATTTCT
RPS2-qPCR-R	TCTTGACGAGGTGGTCAGTG
CD47-L-pair1-F	GGAACCCCTTAATGCATTCAAAG
CD47-L-pair1-R	TGTTTCTTCTCCCCAACAGTG
CD47-S-pair1-F	CTCCTAGGAATAACTGAAGTGA
CD47-S-pair1-R	AAGGCCATGGTGCTTAAACA
CD47-L/S-pair2-F	CATGGCCCTCTTCTGATTTC
CD47-L-pair2-R	CTTTGAATGCATTAAGGGGTTCC
CD47-S-pair2-R	CTTCAGTTATTCCTAGGAGGTTG
CD47-qPCR-F	GTACAGCGATTGGATTAACCTCC
CD47-qPCR-R	ACCACAGCGAGGATATAGGCT
HNRNPA1-qPCR-F	TCAGAGTCTCCTAAAGAGCCC
HNRNPA1-qPCR-R	ACCTTGTGTGGCCTTGCAT
GAPDH-qPCR-F	CAGAACATCATCCCTGCCTCTAC
GAPDH-qPCR-R	TTGAAGTCAGAGGAGACCACCTG
Primers used for cloning reaction
CD47-AsisI-F	AGGAGATCTGCCGCCGCGATCGCATGTGGCCCCTGGTAGCG
CD47-L-MluI-R	CTCGAGCGGCCGCGTACGCGTTTATTCATCATTCATCATTCCTTTTG
CD47-S-MluI-R	CTCGAGCGGCCGCGTACGCGTTCAGTTATTCCTAGGAGGTTGTATAGTCT
Primers used for mutagenesis
CD47-delE910-anti	CACTGCGGCCGCTTATTCCTAGGAGGTTGTATAG
CD47-delE910	CTATACAACCTCCTAGGAATAAGCGGCCGCAGTG
siRNA
siRACK1-530-sense	GGAACCUGGCUAACUGCAAGCUGAA
siRACK1-530-antisense	UUCAGCUUGCAGUUAGCCAGGUUCC
siRAB32-468-sense	CCAGGUGGACCAAUUCUGCAAAGAA
siRAB32-468-antisense	UUCUUUGCAGAAUUGGUCCACCUGG
siTCP1-69-sense	GGCUGCAGCUUCGAUUGCCAAUAUU
siTCP1-69-antisense	AAUAUUGGCAAUCGAAGCUGCAGCC
siRPS2-360-sense	GCGCACCAGGUUCAAGGCAUUUGUU
siRPS2-360-antisense	AACAAAUGCCUUGAACCUGGUGCGC
siNC-sense	UUCUCCGAACGUGUCACGU
siNC-antisense	TAAGAGGCUUGCACAGUGCA
ASOs
ASO-control	C*C*T*C*T*T*A*C*C*TCAGTTA*C*A*A*T*T*T*A*T*A
ASO-C47-E9a	C*C*T*C*T*A*C*AGCTTT*C*T*G*A*A*A*A*A*T
ASO-C47-E9b	C*C*A*C*A*T*A*CCATTA*A*G*G*G*G*T*T*C
ASO-C47-E10	C*C*T*T*T*T*G*A*TTCTTT*G*A*A*T*G*C*T*A*G*G*A
ASO-C47-I10-H1	C*T*C*T*C*A*A*C*C*T*CTCTCT*T*T*A*A*T*C*A*T*C
ASO-C47-I8-A1	C*T*C*C*T*A*A*A*A*T*TACTCC*T*T*T*C*T*T*G*C
ASO-C47-I9a-A1	A*A*C*A*T*C*T*GCCTTC*C*G*G*G*T*T
ASO-C47-I9b-A1	C*T*A*G*T*C*T*A*C*AACTCT*A*C*A*G*C*C*A*A
ASO-C47-I7a-A1	C*T*C*A*C*T*G*CTCCTG*T*G*T*C*T*T*A*C
ASO-C47-I7b-A1	C*A*C*T*A*C*T*CCATCT*C*C*C*T*T*A*G*C*T*C
ASO-C47-I7c-A1	C*T*C*C*C*T*C*C*T*CTATCT*A*C*C*C*A*G*A*G
*: indicated phosphorothioate modifications.
FISH probe
U6-FISH-FAM	5'-FAM-AGGGGCCATGCTAATCTTCT-3'
18s-FISH-TAMRA	5'-TAMRA-ACCAACAAAATAGAACCGCG-3'
C47L-FISH-FAM	5'-FAM-TTCTTTGAATGCATTAAGGGG-3'
C47S-FISH-Cy5	5'-CY-5-CACTTCAGTTATTCCTAGGAGGTTG-3'
