# Supplementary material for: Isoform switching of CD47 induces macrophage-initiated cancer cell pyroptosis
Source: Research Square preprint supplement (doi:10.21203/rs.3.rs-6981061/v1), 2025-08-08
Supplement: Supplementary file 7 [file d421a3e3e2810a1bf3084615.xlsx]

## Sheet: MicroAS-seq PCR1
Supplementary Table MicroAS-seq Adapter Set Design Template. Table of DNA oligos used in 1st round PCR (5' to 3').
PCR1 Forward primers
Name	ID	Adapter	barcode	Spacer	Primer for the target		Please insert your target primer-F	Auto created Full Primer sequence-F	Complete primer length
AS-gene-p1f1	F1	TCGGCAGCGTCAGATGTGTATAAGAGACAG	ATCACG		[Primer for the target]		xxxxxxxxxxxxxxxxxxxxx	TCGGCAGCGTCAGATGTGTATAAGAGACAGATCACGxxxxxxxxxxxxxxxxxxxxx	57
AS-gene-p1f2	F2	TCGGCAGCGTCAGATGTGTATAAGAGACAG	CGATGT	N	[Primer for the target]		xxxxxxxxxxxxxxxxxxxxx	TCGGCAGCGTCAGATGTGTATAAGAGACAGCGATGTNxxxxxxxxxxxxxxxxxxxxx	58
AS-gene-p1f3	F3	TCGGCAGCGTCAGATGTGTATAAGAGACAG	TTAGGC	NN	[Primer for the target]		xxxxxxxxxxxxxxxxxxxxx	TCGGCAGCGTCAGATGTGTATAAGAGACAGTTAGGCNNxxxxxxxxxxxxxxxxxxxxx	59
AS-gene-p1f4	F4	TCGGCAGCGTCAGATGTGTATAAGAGACAG	TGACCA	NNN	[Primer for the target]		xxxxxxxxxxxxxxxxxxxxx	TCGGCAGCGTCAGATGTGTATAAGAGACAGTGACCANNNxxxxxxxxxxxxxxxxxxxxx	60
AS-gene-p1f5	F5	TCGGCAGCGTCAGATGTGTATAAGAGACAG	ACAGTG	NNNN	[Primer for the target]		xxxxxxxxxxxxxxxxxxxxx	TCGGCAGCGTCAGATGTGTATAAGAGACAGACAGTGNNNNxxxxxxxxxxxxxxxxxxxxx	61
AS-gene-p1f6	F6	TCGGCAGCGTCAGATGTGTATAAGAGACAG	GCCAAT	NNNNN	[Primer for the target]		xxxxxxxxxxxxxxxxxxxxx	TCGGCAGCGTCAGATGTGTATAAGAGACAGGCCAATNNNNNxxxxxxxxxxxxxxxxxxxxx	62
AS-gene-p1f7	F7	TCGGCAGCGTCAGATGTGTATAAGAGACAG	CAGATC	NNNNNN	[Primer for the target]		xxxxxxxxxxxxxxxxxxxxx	TCGGCAGCGTCAGATGTGTATAAGAGACAGCAGATCNNNNNNxxxxxxxxxxxxxxxxxxxxx	63
AS-gene-p1f8	F8	TCGGCAGCGTCAGATGTGTATAAGAGACAG	ACTTGA	NNNNNNN	[Primer for the target]		xxxxxxxxxxxxxxxxxxxxx	TCGGCAGCGTCAGATGTGTATAAGAGACAGACTTGANNNNNNNxxxxxxxxxxxxxxxxxxxxx	64
AS-gene-p1f9	F9	TCGGCAGCGTCAGATGTGTATAAGAGACAG	GATCAG	NNNNNNNN	[Primer for the target]		xxxxxxxxxxxxxxxxxxxxx	TCGGCAGCGTCAGATGTGTATAAGAGACAGGATCAGNNNNNNNNxxxxxxxxxxxxxxxxxxxxx	65
AS-gene-p1f10	F10	TCGGCAGCGTCAGATGTGTATAAGAGACAG	TAGCTT	NNNNNNNNN	[Primer for the target]		xxxxxxxxxxxxxxxxxxxxx	TCGGCAGCGTCAGATGTGTATAAGAGACAGTAGCTTNNNNNNNNNxxxxxxxxxxxxxxxxxxxxx	66
AS-gene-p1f11	F11	TCGGCAGCGTCAGATGTGTATAAGAGACAG	GGCTAC	NNNNNNNNNN	[Primer for the target]		xxxxxxxxxxxxxxxxxxxxx	TCGGCAGCGTCAGATGTGTATAAGAGACAGGGCTACNNNNNNNNNNxxxxxxxxxxxxxxxxxxxxx	67
AS-gene-p1f12	F12	TCGGCAGCGTCAGATGTGTATAAGAGACAG	CTTGTA	NNNNNNNNNNN	[Primer for the target]		xxxxxxxxxxxxxxxxxxxxx	TCGGCAGCGTCAGATGTGTATAAGAGACAGCTTGTANNNNNNNNNNNxxxxxxxxxxxxxxxxxxxxx	68
PCR1 reverse primers
Name	ID	Adapter	barcode	Spacer	Primer for the target		Please insert your target primer-R	Auto created Full Primer sequence-R	Complete primer length
AS-gene-p1r1	R1	CGTGGGCTCGGAGATGTGTATAAGAGACAG	GTTTCG		[Primer for the target]		xxxxxxxxxxxxxxxxxxxxx	CGTGGGCTCGGAGATGTGTATAAGAGACAGGTTTCGxxxxxxxxxxxxxxxxxxxxx	57
AS-gene-p1r2	R2	CGTGGGCTCGGAGATGTGTATAAGAGACAG	CGTACG	N	[Primer for the target]		xxxxxxxxxxxxxxxxxxxxx	CGTGGGCTCGGAGATGTGTATAAGAGACAGCGTACGNxxxxxxxxxxxxxxxxxxxxx	58
AS-gene-p1r3	R3	CGTGGGCTCGGAGATGTGTATAAGAGACAG	GAGTGG	NN	[Primer for the target]		xxxxxxxxxxxxxxxxxxxxx	CGTGGGCTCGGAGATGTGTATAAGAGACAGGAGTGGNNxxxxxxxxxxxxxxxxxxxxx	59
AS-gene-p1r4	R4	CGTGGGCTCGGAGATGTGTATAAGAGACAG	GGTAGC	NNN	[Primer for the target]		xxxxxxxxxxxxxxxxxxxxx	CGTGGGCTCGGAGATGTGTATAAGAGACAGGGTAGCNNNxxxxxxxxxxxxxxxxxxxxx	60
AS-gene-p1r5	R5	CGTGGGCTCGGAGATGTGTATAAGAGACAG	ACTGAT	NNNN	[Primer for the target]		xxxxxxxxxxxxxxxxxxxxx	CGTGGGCTCGGAGATGTGTATAAGAGACAGACTGATNNNNxxxxxxxxxxxxxxxxxxxxx	61
AS-gene-p1r6	R6	CGTGGGCTCGGAGATGTGTATAAGAGACAG	ATGAGC	NNNNN	[Primer for the target]		xxxxxxxxxxxxxxxxxxxxx	CGTGGGCTCGGAGATGTGTATAAGAGACAGATGAGCNNNNNxxxxxxxxxxxxxxxxxxxxx	62
AS-gene-p1r7	R7	CGTGGGCTCGGAGATGTGTATAAGAGACAG	ATTCCT	NNNNNN	[Primer for the target]		xxxxxxxxxxxxxxxxxxxxx	CGTGGGCTCGGAGATGTGTATAAGAGACAGATTCCTNNNNNNxxxxxxxxxxxxxxxxxxxxx	63
AS-gene-p1r8	R8	CGTGGGCTCGGAGATGTGTATAAGAGACAG	CAAAAG	NNNNNNN	[Primer for the target]		xxxxxxxxxxxxxxxxxxxxx	CGTGGGCTCGGAGATGTGTATAAGAGACAGCAAAAGNNNNNNNxxxxxxxxxxxxxxxxxxxxx	64
AS-gene-p1r9	R9	CGTGGGCTCGGAGATGTGTATAAGAGACAG	CAACTA	NNNNNNNN	[Primer for the target]		xxxxxxxxxxxxxxxxxxxxx	CGTGGGCTCGGAGATGTGTATAAGAGACAGCAACTANNNNNNNNxxxxxxxxxxxxxxxxxxxxx	65
AS-gene-p1r10	R10	CGTGGGCTCGGAGATGTGTATAAGAGACAG	CACCGG	NNNNNNNNN	[Primer for the target]		xxxxxxxxxxxxxxxxxxxxx	CGTGGGCTCGGAGATGTGTATAAGAGACAGCACCGGNNNNNNNNNxxxxxxxxxxxxxxxxxxxxx	66
AS-gene-p1r11	R11	CGTGGGCTCGGAGATGTGTATAAGAGACAG	CACGAT	NNNNNNNNNN	[Primer for the target]		xxxxxxxxxxxxxxxxxxxxx	CGTGGGCTCGGAGATGTGTATAAGAGACAGCACGATNNNNNNNNNNxxxxxxxxxxxxxxxxxxxxx	67
AS-gene-p1r12	R12	CGTGGGCTCGGAGATGTGTATAAGAGACAG	CACTCA	NNNNNNNNNNN	[Primer for the target]		xxxxxxxxxxxxxxxxxxxxx	CGTGGGCTCGGAGATGTGTATAAGAGACAGCACTCANNNNNNNNNNNxxxxxxxxxxxxxxxxxxxxx	68

## Sheet: MicroAS-seq PCR2
Supplementary Table MicroAS-seq Adapter Set Design Template. Table of DNA oligos used in 2nd round PCR (5' to 3').
PCR2 forward primer
Name	PCR2-F primer sequence	Adapter	i5 Index	i5 Index on sequencing sample sheet	Overlap adapter2
ASseq-PCR2-F1	AATGATACGGCGACCACCGAGATCTACACAGCGCTAGTCGTCGGCAGCGTCAGATG	AATGATACGGCGACCACCGAGATCTACAC	AGCGCTAG	AGCGCTAG	TCGTCGGCAGCGTCAGATG
ASseq-PCR2-F2	AATGATACGGCGACCACCGAGATCTACACGATATCGATCGTCGGCAGCGTCAGATG	AATGATACGGCGACCACCGAGATCTACAC	GATATCGA	GATATCGA	TCGTCGGCAGCGTCAGATG
ASseq-PCR2-F3	AATGATACGGCGACCACCGAGATCTACACCGCAGACGTCGTCGGCAGCGTCAGATG	AATGATACGGCGACCACCGAGATCTACAC	CGCAGACG	CGCAGACG	TCGTCGGCAGCGTCAGATG
ASseq-PCR2-F4	AATGATACGGCGACCACCGAGATCTACACTATGAGTATCGTCGGCAGCGTCAGATG	AATGATACGGCGACCACCGAGATCTACAC	TATGAGTA	TATGAGTA	TCGTCGGCAGCGTCAGATG
ASseq-PCR2-F5	AATGATACGGCGACCACCGAGATCTACACACATAGCGTCGTCGGCAGCGTCAGATG	AATGATACGGCGACCACCGAGATCTACAC	ACATAGCG	ACATAGCG	TCGTCGGCAGCGTCAGATG
ASseq-PCR2-F6	AATGATACGGCGACCACCGAGATCTACACGTGCGATATCGTCGGCAGCGTCAGATG	AATGATACGGCGACCACCGAGATCTACAC	GTGCGATA	GTGCGATA	TCGTCGGCAGCGTCAGATG
ASseq-PCR2-F7	AATGATACGGCGACCACCGAGATCTACACCCAACAGATCGTCGGCAGCGTCAGATG	AATGATACGGCGACCACCGAGATCTACAC	CCAACAGA	CCAACAGA	TCGTCGGCAGCGTCAGATG
ASseq-PCR2-F8	AATGATACGGCGACCACCGAGATCTACACTTGGTGAGTCGTCGGCAGCGTCAGATG	AATGATACGGCGACCACCGAGATCTACAC	TTGGTGAG	TTGGTGAG	TCGTCGGCAGCGTCAGATG
ASseq-PCR2-F9	AATGATACGGCGACCACCGAGATCTACACAACCGCGGTCGTCGGCAGCGTCAGATG	AATGATACGGCGACCACCGAGATCTACAC	AACCGCGG	AACCGCGG	TCGTCGGCAGCGTCAGATG
ASseq-PCR2-F10	AATGATACGGCGACCACCGAGATCTACACGGTTATAATCGTCGGCAGCGTCAGATG	AATGATACGGCGACCACCGAGATCTACAC	GGTTATAA	GGTTATAA	TCGTCGGCAGCGTCAGATG
ASseq-PCR2-F11	AATGATACGGCGACCACCGAGATCTACACCTAGCTTGTCGTCGGCAGCGTCAGATG	AATGATACGGCGACCACCGAGATCTACAC	CTAGCTTG	CTAGCTTG	TCGTCGGCAGCGTCAGATG
ASseq-PCR2-F12	AATGATACGGCGACCACCGAGATCTACACTCGATCCATCGTCGGCAGCGTCAGATG	AATGATACGGCGACCACCGAGATCTACAC	TCGATCCA	TCGATCCA	TCGTCGGCAGCGTCAGATG
PCR2 reverse primers
Name	PCR2-R primer sequence	Adapter	i7 Index	i7 Index on sequencing sample sheet	Overlap adapter2
ASseq-PCR2-R1	CAAGCAGAAGACGGCATACGAGATGTGAATATGTCTCGTGGGCTCGGAGATG	CAAGCAGAAGACGGCATACGAGAT	GTGAATAT	ATATTCAC	GTCTCGTGGGCTCGGAGATG
ASseq-PCR2-R2	CAAGCAGAAGACGGCATACGAGATACAGGCGCGTCTCGTGGGCTCGGAGATG	CAAGCAGAAGACGGCATACGAGAT	ACAGGCGC	GCGCCTGT	GTCTCGTGGGCTCGGAGATG
ASseq-PCR2-R3	CAAGCAGAAGACGGCATACGAGATCATAGAGTGTCTCGTGGGCTCGGAGATG	CAAGCAGAAGACGGCATACGAGAT	CATAGAGT	ACTCTATG	GTCTCGTGGGCTCGGAGATG
ASseq-PCR2-R4	CAAGCAGAAGACGGCATACGAGATTGCGAGACGTCTCGTGGGCTCGGAGATG	CAAGCAGAAGACGGCATACGAGAT	TGCGAGAC	GTCTCGCA	GTCTCGTGGGCTCGGAGATG
ASseq-PCR2-R5	CAAGCAGAAGACGGCATACGAGATTCTCTACTGTCTCGTGGGCTCGGAGATG	CAAGCAGAAGACGGCATACGAGAT	TCTCTACT	AGTAGAGA	GTCTCGTGGGCTCGGAGATG
ASseq-PCR2-R6	CAAGCAGAAGACGGCATACGAGATCTCTCGTCGTCTCGTGGGCTCGGAGATG	CAAGCAGAAGACGGCATACGAGAT	CTCTCGTC	GACGAGAG	GTCTCGTGGGCTCGGAGATG
ASseq-PCR2-R7	CAAGCAGAAGACGGCATACGAGATCCAAGTCTGTCTCGTGGGCTCGGAGATG	CAAGCAGAAGACGGCATACGAGAT	CCAAGTCT	AGACTTGG	GTCTCGTGGGCTCGGAGATG
ASseq-PCR2-R8	CAAGCAGAAGACGGCATACGAGATTTGGACTCGTCTCGTGGGCTCGGAGATG	CAAGCAGAAGACGGCATACGAGAT	TTGGACTC	GAGTCCAA	GTCTCGTGGGCTCGGAGATG
ASseq-PCR2-R9	CAAGCAGAAGACGGCATACGAGATGCAGAATTGTCTCGTGGGCTCGGAGATG	CAAGCAGAAGACGGCATACGAGAT	GCAGAATT	AATTCTGC	GTCTCGTGGGCTCGGAGATG
ASseq-PCR2-R10	CAAGCAGAAGACGGCATACGAGATATGAGGCCGTCTCGTGGGCTCGGAGATG	CAAGCAGAAGACGGCATACGAGAT	ATGAGGCC	GGCCTCAT	GTCTCGTGGGCTCGGAGATG
ASseq-PCR2-R11	CAAGCAGAAGACGGCATACGAGATACTAAGATGTCTCGTGGGCTCGGAGATG	CAAGCAGAAGACGGCATACGAGAT	ACTAAGAT	ATCTTAGT	GTCTCGTGGGCTCGGAGATG
ASseq-PCR2-R12	CAAGCAGAAGACGGCATACGAGATGTCGGAGCGTCTCGTGGGCTCGGAGATG	CAAGCAGAAGACGGCATACGAGAT	GTCGGAGC	GCTCCGAC	GTCTCGTGGGCTCGGAGATG
